# Supplementary material for: Effectiveness of a pharmacist-driven intervention in COPD (EPIC): study protocol for a randomized controlled trial
Source: Springer Nature journal article supplement (doi:10.1186/s13063-016-1623-7), 2016-10-13

# **COPD THERAPEUTICS- INTERVENTION GROUP**

---

## Presenter Disclosure

- I have nothing to disclose

## Learning Objectives

1. Identify patients at risk of COPD
2. Identify patients who may have undiagnosed COPD and would benefit from initiation of pharmacotherapy
3. Assess whether a patient with COPD is being optimally managed
4. Assess whether a patient is using the most appropriate inhaler device/delivery system
5. Promote non-pharmacological COPD management strategies
6. Utilize clinical services to aid COPD medication and device management

## Outline

- COPD Background
  - What is COPD?
  - Pathophysiology
  - Symptoms
  - Risk Factors
  - Diagnosis
  - Classification
- Framework for Pharmacist's Role in COPD Management
  - Screening for Undiagnosed COPD
  - Drug Therapy Management
  - Assessment of Inhalation Technique
  - Clinical Services

## Abbreviations

- **COPD** = Chronic Obstructive Pulmonary Disease
- **CTS** = Canadian Thoracic Society
- **FEV<sub>1</sub>** = forced expiratory volume in one second
- **FVC** = forced vital capacity
- **GOLD** = Global Initiative for Chronic Obstructive Lung Disease
- **ICS** = inhaled corticosteroid
- **LAAC** = long-acting anticholinergic *or* **LAMA** = long-acting muscarinic antagonist
- **LABA** = long-acting beta<sub>2</sub>-agonist
- **MRC** = Medical Research Council
- **PEV** = Peak expiratory volume
- **SAAC** = short-acting anticholinergic *or* **SAMA** = short-acting muscarinic antagonist
- **SABA** = short-acting beta<sub>2</sub>-agonist
- **SABD** = short-acting bronchodilator

## COPD BACKGROUND

---

## What is COPD?

### Definition

- "Respiratory disease largely caused by smoking, characterized by progressive, partially reversible airway obstruction and lung hyperinflation, systemic manifestations, and increasing frequency and severity of exacerbations"<sup>1</sup>

### Epidemiology

- 3 million Canadians may have COPD (1.6 million may be undiagnosed)<sup>2</sup>
- 4<sup>th</sup> leading cause of death in Canada<sup>3</sup>
- Global prevalence is 9-10%<sup>4</sup>
- One of top 5 causes of death worldwide<sup>5</sup>
- Only chronic disease in which mortality is still increasing<sup>6</sup>

1. O'Donnell DE et al. Can Respir J. 2008;15(Suppl A):1A-8A. 2. Canadian Lung Association. [http://www.lung.ca/pdf/copd/COPD\\_in\\_Canada.pdf](http://www.lung.ca/pdf/copd/COPD_in_Canada.pdf). 3. Statistics Canada. <http://www.statcan.gc.ca/tables-tableaux/sum-som/01/cst01/hlth36a-eng.htm>. 4. Bryant J et al. <http://respiratory-research.com/content/14/1/109#B22>. 5. World Health Organization. <http://www.who.int/mediacentre/factsheets/fs310/en/>. 6. Benady, S. [http://www.lung.ca/cts-sct/pdf/COPDReport\\_Epdf](http://www.lung.ca/cts-sct/pdf/COPDReport_Epdf).

## Pathophysiology<sup>1</sup>

### Mechanism underlying airflow limitation in COPD<sup>2</sup>

- Small airways disease
- Airway inflammation
- Airway fibrosis
- Luminal plugs
- Increased airway resistance

- Lung tissue destruction
- Loss of alveolar attachments
- Decrease of elastic recoil

**AIRFLOW LIMITATION**

1. O'Donnell DE et al. Can Respir J. 2008;15(Suppl A):1A-8A. 2. Global Initiative for Chronic Obstructive Lung Disease (GOLD). [http://www.goldcopd.org/uploads/users/files/GOLD\\_Report\\_2014\\_Jun11.pdf](http://www.goldcopd.org/uploads/users/files/GOLD_Report_2014_Jun11.pdf).

## Symptoms

| Chronic Cough <sup>1,2</sup>                                                                                                                                        | Sputum <sup>1,3</sup> Production                                                              | Dyspnea <sup>1,2</sup>                                                                                                                                                                   |
|---------------------------------------------------------------------------------------------------------------------------------------------------------------------|-----------------------------------------------------------------------------------------------|------------------------------------------------------------------------------------------------------------------------------------------------------------------------------------------|
| <ul style="list-style-type: none"> <li>Often first symptom to develop</li> </ul>                                                                                    | <ul style="list-style-type: none"> <li>Small volumes produced after coughing bouts</li> </ul> | <ul style="list-style-type: none"> <li>Cardinal symptom of COPD</li> </ul>                                                                                                               |
| <ul style="list-style-type: none"> <li>Usually starts on intermittently but later occurs daily and throughout the day</li> <li>Seldom entirely nocturnal</li> </ul> |                                                                                               | <ul style="list-style-type: none"> <li>Increased at onset, then persistent and progressive</li> <li>Described as increased effort to breath, heaviness or gasping<sup>2</sup></li> </ul> |

**PRACTICE PEARL**  
**Assess all patients looking to purchase OTC products for a non-productive or phlegmy cough to determine the nature and pattern of their symptoms and their smoking status.**

1. Black A. <http://www.ajol.info/index.php/cme/article/download/50284/38971>. 2. Global Initiative for Chronic Obstrudive LungDisease (GOLD). [http://www.goldcopd.org/uploads/users/files/GOLD\\_Report\\_2013\\_Feb20.pdf](http://www.goldcopd.org/uploads/users/files/GOLD_Report_2013_Feb20.pdf). 3. Currie GP. ABC of COPD. 2011.

## Dyspnea Scale

| The MRC Dyspnea Scale <sup>1,2</sup> |                                                                                           |
|--------------------------------------|-------------------------------------------------------------------------------------------|
| Grade                                | Description                                                                               |
| 0                                    | Not troubled by breathlessness except with strenuous exercise                             |
| 1                                    | Worse than grade 0, but only when walking up a hill or walking fast                       |
| 2                                    | Worse than grade 1, but only when walking on level ground                                 |
| 3                                    | Stops for breath after walking about 100 yards (90 m) or after a few minutes on the level |
| 4                                    | Too breathless to leave the house or breathless when dressing or undressing               |

**PRACTICE PEARL**  
**Utilize a modified version of the MRC Dyspnea Scale to assess the efficacy of current pharmacotherapy and disease impact.**

1. O'Donnell DE et al. Can Respir J. 2008;15(Suppl A):1A-8A. 2. O'Donnell DE et al. Can Respir J. 2007;14(Suppl B):5B-32B.

## Risk Factors<sup>1,2,3,4</sup>

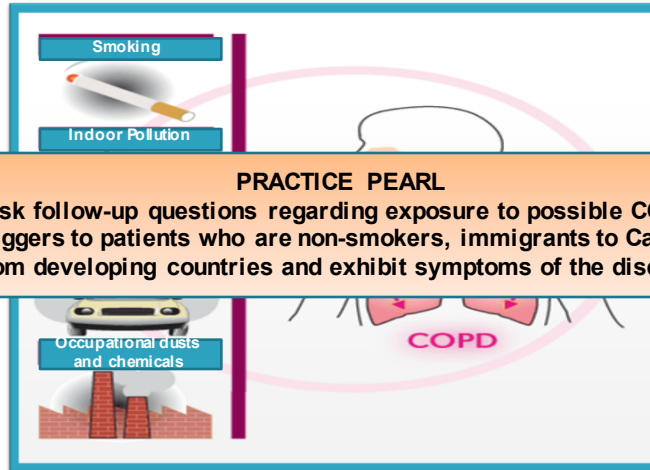

**PRACTICE PEARL**  
 Ask follow-up questions regarding exposure to possible COPD triggers to patients who are non-smokers, immigrants to Canada from developing countries and exhibit symptoms of the disease.

1. Currie GP. ABC of COPD. 2011. 2. Public Health Agency of Canada. <http://www.phac-aspc.gc.ca/cd-mcbrd-mrc/copd-mnoc-eng.php>. 3. Global Initiative for Chronic Obstructive Lung Disease (GOLD). [http://www.goldcopd.org/uploads/usersfiles/GOLD\\_Report\\_2014\\_Jun11.pdf](http://www.goldcopd.org/uploads/usersfiles/GOLD_Report_2014_Jun11.pdf). 4. Image from Doctor Tipster. <http://www.doctoripster.com/3442-chronic-obstructive-pulmonary-disease-copd-risk-factors-diagnos-clinical-form-complications-evolution-and-prognosis.html>.

## Diagnosis<sup>1,3</sup>

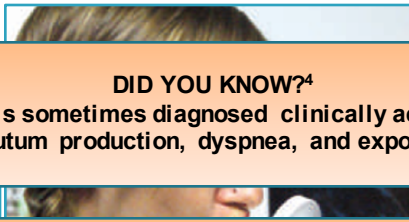

**DID YOU KNOW?<sup>4</sup>**  
 In practice, COPD is sometimes diagnosed clinically according to reported chronic cough, sputum production, dyspnea, and exposure to risk factors.

maximal inspiration | FVC maneuver

**PRACTICE PEARL**  
 Encourage patients to get tested!  
 Know the locations of walk-in clinics in your area if a patient does not have a family physician or if access may be delayed.

1. McIvor RA. <http://www.e-therapeutics.ca/nc/showChapter.action?documentId=c0040#c0040n00008>. 2. Black A. <http://www.ajol.info/index.php/cme/article/download/50284/38971>. 3. O'Donnell DE et al. Can Respir J. 2007;14(Suppl B):5B-32B. 4. Johns R. Pharm Prac. 2013.

## Classification<sup>2,3</sup>

### Canadian Thoracic Society COPD classification of severity by symptoms and disability, and impairment of lung function<sup>1</sup>

| Classification by symptoms and disability     |                                                                                                                                                                                                                                 |
|-----------------------------------------------|---------------------------------------------------------------------------------------------------------------------------------------------------------------------------------------------------------------------------------|
| COPD stage                                    | Symptoms                                                                                                                                                                                                                        |
| Mild                                          | Shortness of breath from COPD when hurrying on the level or walking up a slight hill                                                                                                                                            |
| Moderate                                      | Shortness of breath from COPD causing the patient to stop after walking approximately 100 m (or after a few minutes) on the level                                                                                               |
| Severe                                        | Shortness of breath from COPD resulting in the patient being too breathless to leave the house, breathless when dressing or undressing, or the presence of chronic respiratory failure or clinical signs of right heart failure |
| Classification by impairment of lung function |                                                                                                                                                                                                                                 |
| COPD stage                                    | Spirometry (postbronchodilator)                                                                                                                                                                                                 |
| Mild                                          | FEV <sub>1</sub> ≥ 80% predicted, FEV <sub>1</sub> /FVC < 0.7                                                                                                                                                                   |
| Moderate                                      | 50% ≤ FEV <sub>1</sub> < 80% predicted, FEV <sub>1</sub> /FVC < 0.7                                                                                                                                                             |
| Severe                                        | 30% ≤ FEV <sub>1</sub> < 50% predicted, FEV <sub>1</sub> /FVC < 0.7                                                                                                                                                             |
| Very severe                                   | FEV <sub>1</sub> < 30% predicted, FEV <sub>1</sub> /FVC < 0.7                                                                                                                                                                   |

1. O'Donnell DE et al. Can Respir J. 2007;14(Suppl B):5B-32B. 2. Black A. <http://www.ajol.info/index.php/cme/article/download/50284/38971>. 3. McIvor RA. <http://www.e-therapeutics.ca/search#>

## COPD Combined Assessment<sup>1,2</sup>

When assessing risk, choose the highest risk according to GOLD grade or exacerbation history. (One or more hospitalizations for COPD exacerbations should be considered *high risk*.)

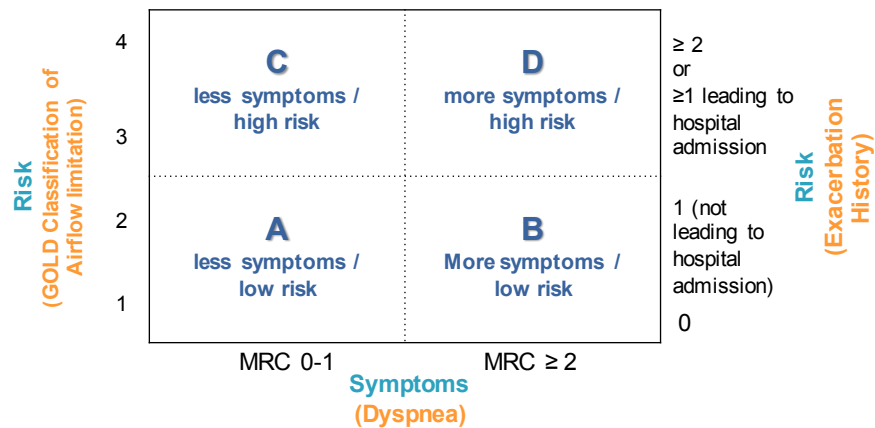

1. Adapted from Global Initiative for Chronic Obstructive Lung Disease (GOLD). [http://www.goldcopd.org/uploads/users/files/GOLD\\_Pocket\\_2014\\_Jun11.pdf](http://www.goldcopd.org/uploads/users/files/GOLD_Pocket_2014_Jun11.pdf). 2. Adapted from Jackson LD. OPA Conference; 2014.

# FRAMEWORK FOR PHARMACIST ROLE IN COPD MANAGEMENT

---

## Goals of COPD Management<sup>1,2</sup>

- Alleviate dyspnea and other respiratory symptoms
- Improve exercise tolerance
- Improve health status
- Prevent disease progression
- Reduce frequency and severity of exacerbations
- Treat exacerbations and complications of the disease
- Reduce mortality

Reduce symptoms

Reduce risk

1. O'Donnell DE et al. Can Respir J. 2008;15(Suppl A):1A-8A. 2. Global Initiative for Chronic Obstructive Lung Disease (GOLD). [http://www.goldcopd.org/uploads/users/files/GOLD\\_Pocket\\_2014\\_Jun11.pdf](http://www.goldcopd.org/uploads/users/files/GOLD_Pocket_2014_Jun11.pdf).



## Comprehensive Approach to Management of COPD<sup>1,2</sup>

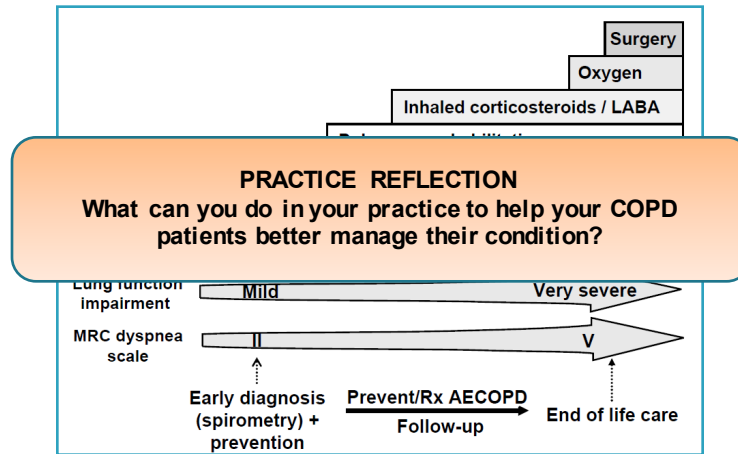

1. O'Donnell DE et al. Can Respir J. 2008;15(Suppl A):1A-8A. 2. Vestbo J et al. Am J Respir Crit Care Med 2013;187:347-65

## Framework for Pharmacist Role

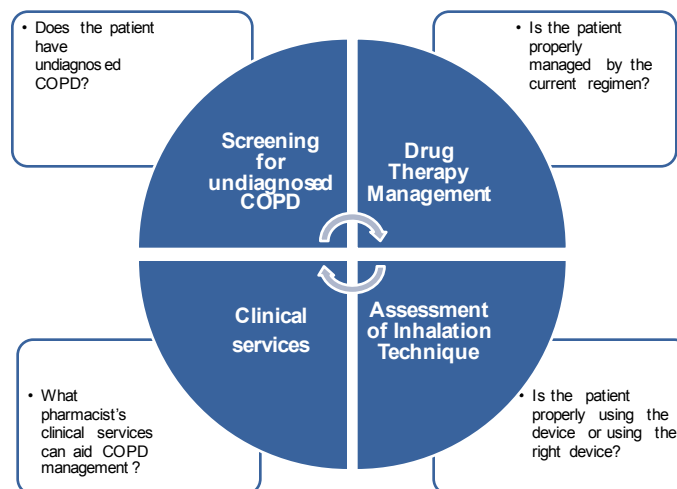

## Framework for Pharmacist Role

1. **Does the patient have undiagnosed COPD?**
2. Is the patient properly managed by the current regimen?
3. Is the patient properly using the device or using the right device?
4. What pharmacist's services can aid COPD management?

## Screening for Undiagnosed COPD<sup>1,2,3</sup>

Tip of the iceberg  
(Diagnosed COPD)

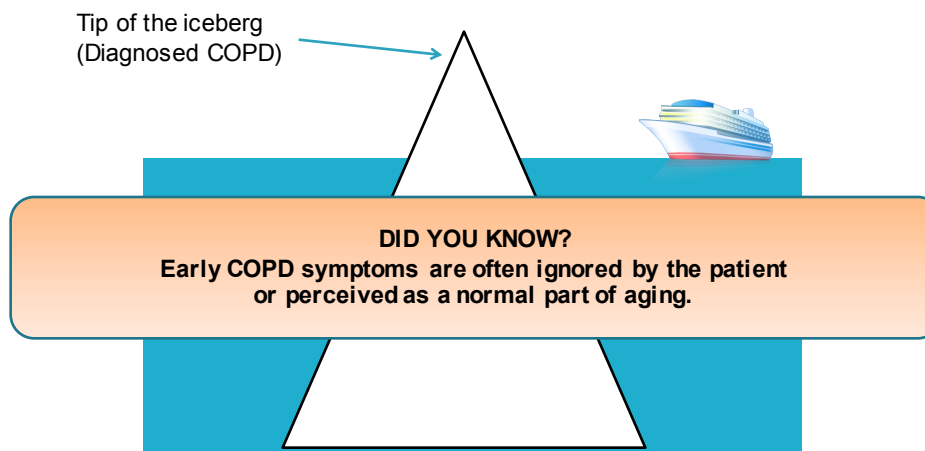

1. Doherty DE. J Am Med Dir Assoc. 2003;4(5 Suppl):S116-S120. 2. Currie GP. ABC of COPD. 2011. 3. O'Donnell DE et al. Can Respir J. 2008;15(Suppl A):1A-8A.

## Screening for Undiagnosed COPD<sup>1,2,3</sup>

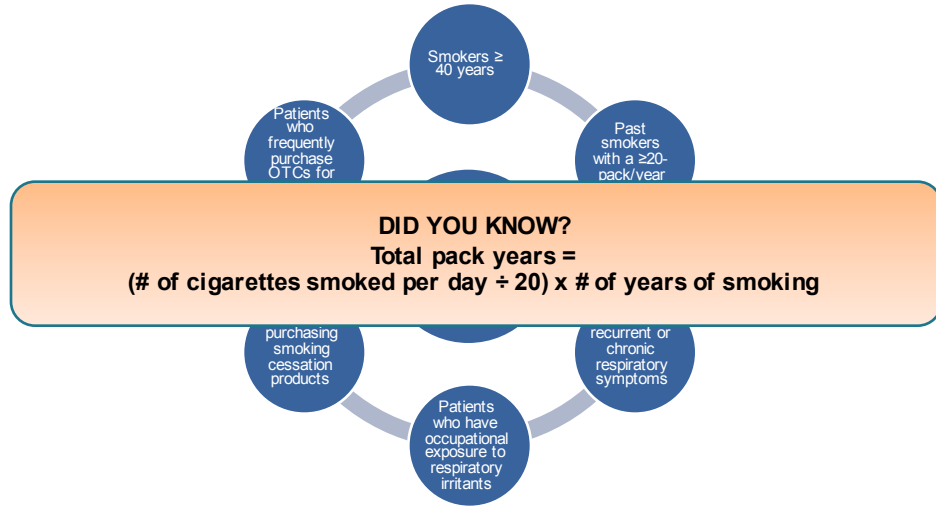

**DID YOU KNOW?**  
**Total pack years =**  
**(# of cigarettes smoked per day ÷ 20) x # of years of smoking**

1. O'Donnell DE et al. Can Respir J. 2008;15(Suppl A):1A-8A. 2. Ortiz G. [http://www.advancesweb.com/web/Astazerecafocus\\_on\\_asthma\\_copd\\_issue5\\_BronchodilatorIssue5.html](http://www.advancesweb.com/web/Astazerecafocus_on_asthma_copd_issue5_BronchodilatorIssue5.html).

## Screening Tools

| Canadian Lung Health Test <sup>1</sup>                                                                                         |                          |                          |
|--------------------------------------------------------------------------------------------------------------------------------|--------------------------|--------------------------|
| If you are over 40 and smoke or used to smoke, you may already have COPD. Take this quick test to screen for symptoms of COPD: |                          |                          |
|                                                                                                                                | Yes                      | No                       |
| 1. Do you cough regularly?                                                                                                     |                          |                          |
| 2. Do you cough up phlegm regularly?                                                                                           |                          |                          |
| 3. Do even simple chores make you short of breath?                                                                             |                          | <input type="checkbox"/> |
| 4. Do you wheeze when you exert yourself (exercise, go upstairs)?                                                              | <input type="checkbox"/> | <input type="checkbox"/> |
| 5. Do you get many colds, and do your colds usually last longer than your friends' colds?                                      | <input type="checkbox"/> | <input type="checkbox"/> |

- B.R.E.A.T.H.S.**
- Breathlessness
  - Repeat infections
  - Exacerbations
  - Activity limitation
  - Tiredness
  - Heavy chest (cough and/or chest tightness)
  - Sputum production

1. Canadian Lung Association. <http://www.copd.ca/Screening/ScreeningTools/BREATHS/>

## Meet Teresa

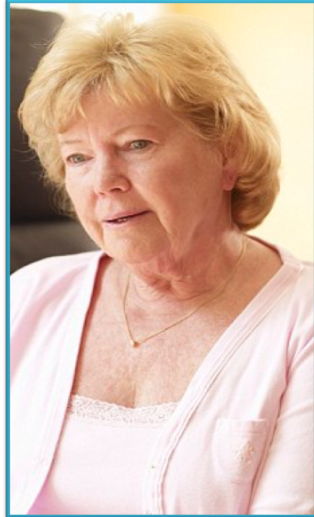

- Regular pharmacy patient
- 61-year old widow
- 3 week phlegmy cough
- 2 colds this year
- Describes feeling a little short of breath even when not sick
- Current non-smoker with 15-year pack history of smoking
- Current medications:
  - Candesartan 16mg od
  - Hydrochlorothiazide 25 mg od
  - Atorvastatin 40mg od
  - Zopiclone 7.5 mg hs prn
- Looking for an OTC product for daily cough

**Does Theresa have COPD?**

## Does Theresa have COPD?

- ✓ Chronic cough
- ✓ Sputum production

### PHARMACIST INTERVENTION

**Advised Theresa to return to her physician for referral for COPD testing. Contacted physician to inform him of recommendation and patient's screening results.**

#### Lung Health test

- ✓ Do you cough regularly?
- ✓ Do you cough up phlegm regularly?
- ✓ Do even simple chores make you short of breath?
- ✓ Do you wheeze when you exert yourself (exercise, go upstairs)?
- ✓ Do you get many colds, and do your colds usually last longer than your friends' colds?

## Framework for Pharmacist Role

1. Does the patient have undiagnosed COPD?
2. **Is the patient properly managed by the current regimen?**
3. Is the patient properly using the device or using the right device?
4. What pharmacist's services can aid COPD management?

## COPD Inhaled Pharmacotherapy<sup>1,2</sup>

| SABA                | SAMA (SAAC)         | SAMA+ SABA                                   | LABA                          | LAMA (LAAC)            | LAMA+ LABA                                                | ICS+ LABA                                     |
|---------------------|---------------------|----------------------------------------------|-------------------------------|------------------------|-----------------------------------------------------------|-----------------------------------------------|
| Salbutamol sulfate  | Ipratropium bromide | Ipratropium bromide + Salbutamol sulfate     | Salmeterol xinafoate          | Tiotropium bromide     | Glycopyrronium bromide + Indacaterol maleate              | Budesonide + Formoterol fumarate dihydrate    |
| Terbutaline sulfate |                     | Ipratropium bromide + Fenoterol hydrobromide | Formoterol fumarate           | Glycopyrronium bromide | Umeclidinium bromide + Vilanterol trifenate               | Fluticasone propionate + Salmeterol xinafoate |
|                     |                     |                                              | Formoterol fumarate dihydrate | Aclidinium bromide     | Tiotropium bromide monohydrate + Olodaterol hydrochloride | Fluticasone furoate + Vilanterol trifenate    |
|                     |                     |                                              | Indacaterol maleate           | Umeclidinium bromide   | Aclidinium bromide + Formoterol fumarate dihydrate        |                                               |

1. O'Donnell DE et al. Can Respir J. 2008;15(Suppl A):1A-8A. 2. McIvor RA. <http://www.e-therapeutics.ca/search#>

## COPD Inhaled Pharmacotherapy

- **SABAs**<sup>1,2</sup>
  - Salbutamol and Terbutaline
  - Recommended prn in all stages of disease severity for immediate symptom relief
  - Sometimes prescribed as initial therapy in patients with symptoms that are only noticeable with exertion and who have relatively little disability
  
- **SAMAs**<sup>1,2</sup>
  - Ipratropium
  - Available as a metered-dose inhaler or solution for nebulization
  - Slower onset of action than SABAs but a longer duration of action (up to 8 hours)
  - Less effective than tiotropium
  - Sometimes prescribed as initial therapy in patients with symptoms that are only noticeable with exertion and who have relatively little disability

1. O'Donnell DE et al. Can Respir J. 2008;15(Suppl A):1A-8A. 2. McIvor RA. <http://www.e-therapeutics.ca/search#>.

## COPD Inhaled Pharmacotherapy

- **SAMAs + SABAs**<sup>1,2,3</sup>
  - Combination products result in greater improvement in lung function with lower or similar incidence of adverse effects
  - Ipratropium + Salbutamol
    - Indicated for treatment of bronchospasm associated with COPD
    - Available as solution for nebulization and soft mist inhaler
  - Ipratropium + Fenoterol
    - Indicated for the treatment of bronchospasm associated with acute severe exacerbations of COPD (and bronchial asthma)
    - Available as a solution for nebulization

1. McIvor RA. <http://www.e-therapeutics.ca/search#>. 2. O'Donnell DE et al. Can Respir J. 2008;15(Suppl A):1A-8A. Boehringer Ingelheim (Canada) Ltd. [http://www.boehringer-ingelheim.ca/content/dam/interne/lopu/ca\\_EN/documents/humanhealth/product\\_monograph/DuoventPMEN.pdf](http://www.boehringer-ingelheim.ca/content/dam/interne/lopu/ca_EN/documents/humanhealth/product_monograph/DuoventPMEN.pdf).

## COPD Inhaled Pharmacotherapy

- **LABAs**<sup>1,2,3</sup>
  - More sustained improvements in pulmonary function, chronic dyspnea and health status than SABAs in patients with moderate to severe COPD
  - Salmeterol = long-acting, slow onset, dry powder inhaled
  - Formoterol = long-acting, rapid onset, dry powder inhaled
  - Indacaterol = once daily, ultra-long-acting, rapid onset, dry powder inhaled
  
- **LAMAs**<sup>1,2,3,4</sup>
  - More sustained effects in pulmonary function, chronic activity-related dyspnea and health status compared with regular dose ipratropium or placebo in patients with moderate to severe COPD
  - Tiotropium = once daily, long-acting dry powder and soft mist inhaled
  - Glycopyrronium = once daily, long-acting, rapid onset, dry powder inhaled
  - Acclidinium = twice daily, long-acting, dry powder inhaled
  - Umeclidinium = once daily, long-acting, dry powder inhaled

1. McIvor RA. <http://www.e-therapeutics.ca/search#> 2. O'Donnell DE et al. Can Respir J. 2008;15(Suppl A):1A-8A 3. Johns R. Pharm Prac. 2013. 4. Jackson LD. OPA Conference; 2014. 5. Australian Prescriber. <http://www.austliianprescriber.com/magazine382/drug1066.pdf>

## COPD Inhaled Pharmacotherapy

- **LAMAs + LABAs**<sup>1</sup>
  - Maximizes bronchodilation and lung deflation
  - Recommended in moderate to severe disease with persistent symptoms and infrequent exacerbations (<1 per year for at least 2 consecutive years)
  - Glycopyrronium + Indacaterol
  - Umeclidinium + Vilanterol
  - Tiotropium + Olodaterol
  - Acclidinium + Formoterol fumarate dihydrate
  
- **ICSs + LABAs**<sup>1,2</sup>
  - Not recommended as monotherapy
  - More effective than either drug alone in terms of exercise endurance, symptom control, lung function and exacerbation rates
  - Recommended to add to LAAC for patients with moderate to severe COPD and repeated exacerbations (≥1 per year for at least 2 consecutive years)
  - Budesonide + Formoterol fumarate dihydrate
  - Fluticasone + Salmeterol
  - Fluticasone + Vilanterol

1. McIvor RA. <http://www.e-therapeutics.ca/search#> 2. O'Donnell DE et al. Can Respir J. 2008;15(Suppl A):1A-8A.

## COPD Pharmacotherapy

- **PDE-4 Inhibitor<sup>1</sup>**

- Roflumilast
- Add-on therapy to bronchodilators for the maintenance treatment of severe COPD associated with chronic bronchitis in adult patients with a history of frequent exacerbations
- Data support addition to foundation bronchodilatory therapy to reduce exacerbations, either before or in addition to introduction of ICS/LABA

- **Oral Systemic Corticosteroids<sup>1</sup>**

- Improve lung function and shorten length of hospital stay and reduce risk of early relapse
- For AECOPDs: 30–40 mg once daily po × 5–14 days
- Tapering not necessary if course < 2 weeks
- No role in COPD maintenance therapy

1. McIvor RA. <http://www.e-therapeutics.ca/search#>

## CTS Recommendations for Optimal Pharmacotherapy<sup>1</sup>

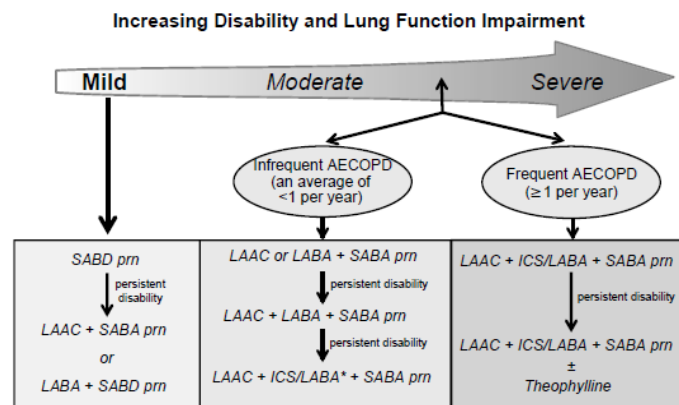

1. O'Donnell DE et al. Can Respir J. 2008;15(Suppl A):1A-8A. 2. Johns R. PharmPrac. 2013.



## GOLD Recommendations for Pharmacological Management of COPD<sup>1</sup>

| Patient Group | Recommended First Choice | Alternative Choice                                                                                 | Other Possible Treatments                         |
|---------------|--------------------------|----------------------------------------------------------------------------------------------------|---------------------------------------------------|
| A             | SAAC prn or SABA prn     | LAAC or LABA or SABA + SAAC                                                                        | Theophylline                                      |
| B             | LAAC or LABA             | LAAC and LABA                                                                                      | SABA and/or SAAC<br>Theophylline                  |
| C             | ICS + LABA or LAAC       | LAAC and LABA or LAAC and PDE-4 Inhibitor or LABA and PDE-4 Inhibitor                              | SABA and/or SAAC<br>Theophylline                  |
| D             | ICS + LABA and/or LAAC   | ICS + LABA and LAAC or ICS + LABA and PDE-4 Inhibitor or LAAC and LABA or LAAC and PDE-4 Inhibitor | Carbocysteine<br>SABA and/or SAAC<br>Theophylline |

1. Adapted from Global Initiative for Chronic Obstructive Lung Disease (GOLD).  
[http://www.goldcopd.org/uploads/users/files/GOLD\\_Pocket\\_2014\\_Jun11.pdf](http://www.goldcopd.org/uploads/users/files/GOLD_Pocket_2014_Jun11.pdf).

## Assessment of Adherence<sup>1</sup>

### Intentional<sup>2</sup>

- Deliberate discontinuation or reduction in use of therapy during periods of symptom remission
- Causes:

erroneous understanding of goals of treatment

### Unintentional<sup>2</sup>

- Non-adherence to treatment advice due to reasons out of patient's control
- Causes:

- Musculoskeletal problems
- Complex medication regimen
- Polypharmacy
- Multiple devices

### PRACTICE PEARL

**Explore ways to simplify medication regimen by recommending the prescribing of once daily agents to physicians if appropriate and ensuring the patient is using one type of inhalation device if possible.**

1. Bourbeau J et al. Thorax. 2008;63(9):831-838 2. Bryant J et al. <http://respiratory-research.com/content/14/1/109#B22>.

## Assessment of Adherence

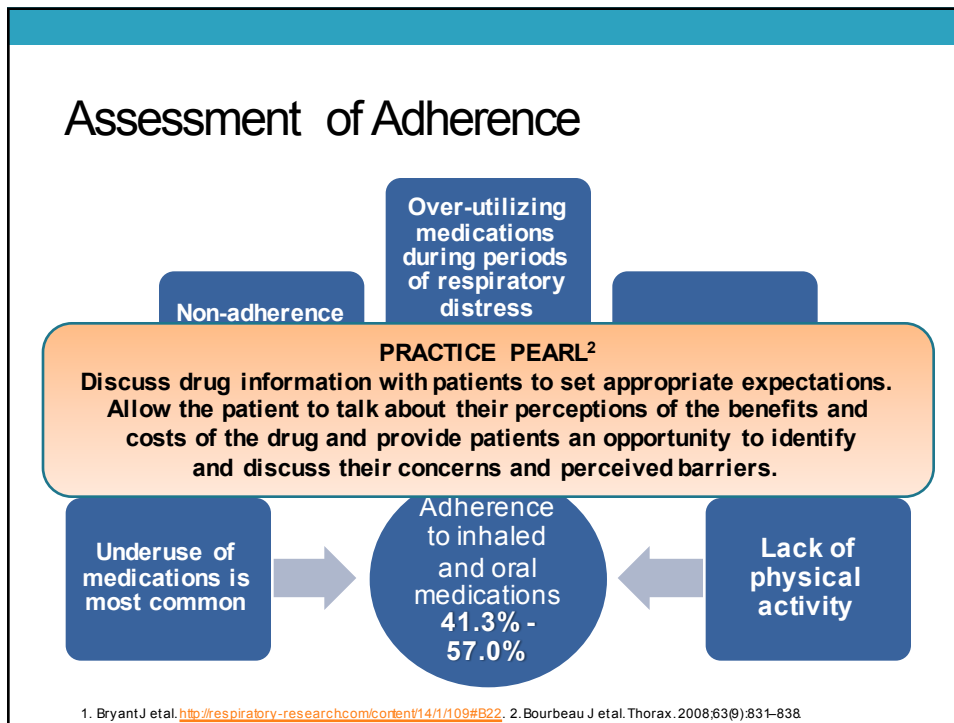

## Assessment of Dyspnea

**Modified Medical Research Council Questionnaire for Assessing the Severity of Breathlessness<sup>1</sup>**

| Grade | Severity | Description of Breathlessness Related to Activities                                                                                                                                                   |                          |
|-------|----------|-------------------------------------------------------------------------------------------------------------------------------------------------------------------------------------------------------|--------------------------|
| 0     | N/A      | I only get breathless with strenuous exercise.<br>• Pharmacist: Do you only get short of breath when you take in strenuous exercise such as running, climbing stairs, or dancing?                     | <input type="checkbox"/> |
| 1     | Mild     | I get short of breath when hurrying on level ground or walking up a slight hill.                                                                                                                      | <input type="checkbox"/> |
| 2     | Mild     | I get short of breath when walking up a slight hill or walking at your own pace on level ground? Do you have to stop for breath when you walk at your own pace?                                       | <input type="checkbox"/> |
| 3     | Moderate | I stop for breath after walking about 100 yards (90 m) or after a few minutes on level ground.<br>• Pharmacist: Do you get short of breath when walking on a level surface for a few minutes?         | <input type="checkbox"/> |
| 4     | Severe   | I am too breathless to leave the house or I am breathless when dressing.<br>• Pharmacist: Are you so short of breath that you have trouble leaving the house or become short of breath when dressing? | <input type="checkbox"/> |

**PRACTICE PEARL**  
 Ask questions that are indicative of the different COPD grades to assess severity of dyspnea, monitor progress and/or response to therapy.

1. Adapted from Global Initiative for Chronic Obstructive Lung Disease (GOLD). [http://www.goldcopd.org/uploads/users/files/GOLD\\_Pocket\\_2014\\_Jun11.pdf](http://www.goldcopd.org/uploads/users/files/GOLD_Pocket_2014_Jun11.pdf).

## Assessment of AECOPDs

### PRACTICE PEARL<sup>2</sup>

Consider referring to AECOPDs as “COPD lung attacks” when speaking with patients that may not appreciate the seriousness of COPD.

increase in the use of maintenance medications

are thought to be infectious in nature

AECOPDs now account

### PRACTICE PEARL<sup>1</sup>

Assess all patients presenting with a prescription for a respiratory infection to assess whether they have been diagnosed with COPD or are smoker or ex-smokers. Focus on the production and colour of phlegm.

readmission rate than other chronic illnesses

1. O'Donnell DE et al. Can Respir J. 2007;14(Suppl B):5B-32B. 2. Benady, S. [http://www.lung.ca/cts-scl/pdf/COPDReport\\_Epdf](http://www.lung.ca/cts-scl/pdf/COPDReport_Epdf).

## COPD Action Plans

- What is an action plan?
  - A COPD Action Plan is a written contract between the patient and their health care team. It will tell them how to manage their COPD flare-ups.
  - It is used along with any other information they get from their health care team about managing their COPD every day.
  - The Action Plan will help the patient and their caregivers to quickly recognize and act to treat the patient's flare-ups.

1. Canadian Thoracic Society. [http://www.respiratoryguidelines.ca/sites/all/files/CTS\\_COPD\\_updated\\_Action\\_Plan\\_editable\\_PDF.pdf](http://www.respiratoryguidelines.ca/sites/all/files/CTS_COPD_updated_Action_Plan_editable_PDF.pdf). 2. Kaplan, A. : <http://www.ccp.ca/content/55/1/58.full.pdf+html>.

**My COPD Action Plan** \_\_\_\_\_ Date \_\_\_\_\_  
 Patient's Copy (Patient's Name)

Canadian Respiratory Guidelines 

This is to tell me how I will take care of myself when I have a COPD flare-up.

My goals are \_\_\_\_\_

My support contacts are \_\_\_\_\_ and \_\_\_\_\_  
 (Name & Phone Number) (Name & Phone Number)

| My Symptoms             | I Feel Well                      | I Feel Worse                                                                                                  | I Feel Much Worse                                                                                                                       |
|-------------------------|----------------------------------|---------------------------------------------------------------------------------------------------------------|-----------------------------------------------------------------------------------------------------------------------------------------|
| I have sputum.          | My usual sputum colour is: _____ | Changes in my sputum, for at least 2 days. Yes <input type="checkbox"/> No <input type="checkbox"/>           | My symptoms are not better after taking my flare-up medicine for 48 hours.                                                              |
| I feel short of breath. | When I do this: _____            | More short of breath than usual for at least 2 days. Yes <input type="checkbox"/> No <input type="checkbox"/> | I am very short of breath, nervous, confused and/or  |

**PRACTICE PEARL**

**Regularly review the action plan with the patient to ensure it is understood and determine whether changes needed to be made.**

|                                                                                          |                                                                                                           |                                                                                                                                                                                                                                                       |
|------------------------------------------------------------------------------------------|-----------------------------------------------------------------------------------------------------------|-------------------------------------------------------------------------------------------------------------------------------------------------------------------------------------------------------------------------------------------------------|
| Notes:                                                                                   | more short of breath than usual, I will take _____ puffs of _____ up to a maximum of _____ times per day. | <b>Important information:</b> I will tell my doctor, respiratory educator, or case manager <b>within 2 days</b> if I had to use any of my flare-up prescriptions. I will also make follow-up appointments to review my COPD Action Plan twice a year. |
| I use my breathing and relaxation methods as taught to me. I pace myself to save energy. | If I am on oxygen, I will increase it from _____ L/min to _____ L/min.                                    |                                                                                                                                                                                                                                                       |

THE LUNG ASSOCIATION\* L'ASSOCIATION PULMONAIRE | CANADIAN THORACIC SOCIETY SOCIÉTÉ CANADIENNE DE THORACOLOGIE | Produced in collaboration with the COPD & Asthma Network of Alberta (CANA). The Canadian Thoracic Society (CTS) acknowledges the past contributions of Living well with COPD and the Family Physician Airways Group of Canada. PART 1 OF 2

1. Canadian Thoracic Society, [http://www.respiratoryguidelines.ca/sites/all/files/CTS\\_COPD\\_updated\\_Action\\_Plan\\_editable\\_PDF.pdf](http://www.respiratoryguidelines.ca/sites/all/files/CTS_COPD_updated_Action_Plan_editable_PDF.pdf), 2. Kaplan, A. : <http://www.cfp.ca/content/55/1/58.full.pdf.html>.

## Teresa again

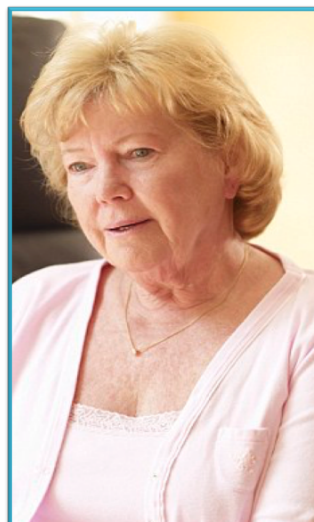

- Like to walk with her friends
  - Enjoys doing house work such as vacuuming.
  - Want to be able to keep on top of her COPD.
  - Does not like getting sick as is looking for a way to be more proactive when she does not feel as well.
- Should Teresa have an action plan?

**My COPD Action Plan** Teresa \_\_\_\_\_ Date May 25, 2015 \_\_\_\_\_  
 Patient's Copy (Patient's Name)

Canadian Respiratory Guidelines COPD Treatable. Preventable.

This is to tell me how I will take care of myself when I have a COPD flare-up.  
 My goals are To be able to do my everyday activities like walking with my friends and doing housework.

My support contacts are \_\_\_\_\_ and \_\_\_\_\_  
 (Name & Phone Number) (Name & Phone Number)

| My Symptoms             | I Feel Well                                                                      | I Feel Worse                                                                                                                                                                                                                                                                              | I Feel Much Worse URGENT                                                                                                                                                                                                                              |
|-------------------------|----------------------------------------------------------------------------------|-------------------------------------------------------------------------------------------------------------------------------------------------------------------------------------------------------------------------------------------------------------------------------------------|-------------------------------------------------------------------------------------------------------------------------------------------------------------------------------------------------------------------------------------------------------|
| I have sputum.          | My usual sputum colour is: <u>Clear</u>                                          | Changes in my sputum, for at least 2 days. Yes <input type="checkbox"/> No <input type="checkbox"/>                                                                                                                                                                                       | My symptoms are not better after taking my flare-up medicine for 48 hours.                                                                                                                                                                            |
| I feel short of breath. | When I do this: <u>If I exercise too much like running to catch a bus.</u>       | More short of breath than usual for at least 2 days. Yes <input type="checkbox"/> No <input type="checkbox"/>                                                                                                                                                                             | I am very short of breath, nervous, confused and/or drowsy, and/or I have chest pain.                                                                                                                                                                 |
| My Actions              | Stay Well                                                                        | Take Action                                                                                                                                                                                                                                                                               | Call For Help                                                                                                                                                                                                                                         |
|                         | I use my daily puffers as directed.<br><br>If I am on oxygen, I use _____ L/min. | If I checked "Yes" to one or both of the above, I use my <b>prescriptions</b> for COPD flare-ups.<br><br>I use my daily puffers as usual. If I am <b>more</b> short of breath than usual, I will take <u>2</u> puffs of <u>Ventolin</u> up to a <b>maximum</b> of <u>4</u> times per day. | I will call my support contact and/or see my doctor and/or go to the nearest emergency department.<br><br><b>I will dial 911.</b>                                                                                                                     |
| <b>Notes:</b>           |                                                                                  | I use my breathing and relaxation methods as taught to me. I pace myself to save energy.<br><br>If I am on oxygen, I will increase it from _____ L/min to _____ L/min.                                                                                                                    | <b>Important information:</b> I will tell my doctor, respiratory educator, or case manager <b>within 2 days</b> if I had to use any of my flare-up prescriptions. I will also make follow-up appointments to review my COPD Action Plan twice a year. |

THE LUNG ASSOCIATION L'ASSOCIATION PULMONAIRE CANADIAN THORACIC SOCIETY SOCIÉTÉ CANADIENNE DE THORACOLOGIE Produced in collaboration with the COPD & Asthma Network of Alberta (CANA). The Canadian Thoracic Society (CTS) acknowledges the past contributions of Living well with COPD and the Family Physician Airways Group of Canada. PART 1 OF 2

**My COPD Action Plan** Teresa \_\_\_\_\_ Date May 25, 2015 \_\_\_\_\_  
 Physician's Copy (Patient's Name)

Canadian Respiratory Guidelines COPD Treatable. Preventable.

This is to tell me how I will take care of myself when I have a COPD flare-up.  
 My goals are To be able to do my everyday activities like walking with my friends and doing housework.

My support contacts are \_\_\_\_\_ and \_\_\_\_\_  
 (Name & Phone Number) (Name & Phone Number)

| My Symptoms             | I Feel Well                                                                      | I Feel Worse                                                                                                                                                                                                                                                                              | I Feel Much Worse URGENT                                                                                                                                                                                                                              |
|-------------------------|----------------------------------------------------------------------------------|-------------------------------------------------------------------------------------------------------------------------------------------------------------------------------------------------------------------------------------------------------------------------------------------|-------------------------------------------------------------------------------------------------------------------------------------------------------------------------------------------------------------------------------------------------------|
| I have sputum.          | My usual sputum colour is: <u>Clear</u>                                          | Changes in my sputum, for at least 2 days. Yes <input type="checkbox"/> No <input type="checkbox"/>                                                                                                                                                                                       | My symptoms are not better after taking my flare-up medicine for 48 hours.                                                                                                                                                                            |
| I feel short of breath. | When I do this: <u>If I exercise too much like running to catch a bus.</u>       | More short of breath than usual for at least 2 days. Yes <input type="checkbox"/> No <input type="checkbox"/>                                                                                                                                                                             | I am very short of breath, nervous, confused and/or drowsy, and/or I have chest pain.                                                                                                                                                                 |
| My Actions              | Stay Well                                                                        | Take Action                                                                                                                                                                                                                                                                               | Call For Help                                                                                                                                                                                                                                         |
|                         | I use my daily puffers as directed.<br><br>If I am on oxygen, I use _____ L/min. | If I checked "Yes" to one or both of the above, I use my <b>prescriptions</b> for COPD flare-ups.<br><br>I use my daily puffers as usual. If I am <b>more</b> short of breath than usual, I will take <u>2</u> puffs of <u>Ventolin</u> up to a <b>maximum</b> of <u>4</u> times per day. | I will call my support contact and/or see my doctor and/or go to the nearest emergency department.<br><br><b>I will dial 911.</b>                                                                                                                     |
| <b>Notes:</b>           |                                                                                  | I use my breathing and relaxation methods as taught to me. I pace myself to save energy.<br><br>If I am on oxygen, I will increase it from _____ L/min to _____ L/min.                                                                                                                    | <b>Important information:</b> I will tell my doctor, respiratory educator, or case manager <b>within 2 days</b> if I had to use any of my flare-up prescriptions. I will also make follow-up appointments to review my COPD Action Plan twice a year. |

THE LUNG ASSOCIATION L'ASSOCIATION PULMONAIRE CANADIAN THORACIC SOCIETY SOCIÉTÉ CANADIENNE DE THORACOLOGIE Produced in collaboration with the COPD & Asthma Network of Alberta (CANA). The Canadian Thoracic Society (CTS) acknowledges the past contributions of Living well with COPD and the Family Physician Airways Group of Canada. PART 1 OF 2

**My COPD Action Plan** Teresa \_\_\_\_\_ Date May 25, 2015 \_\_\_\_\_  
Educator's Copy (Patient's Name)




This is to tell me how I will take care of myself when I have a COPD flare-up.  
 My goals are To be able to do my everyday activities like walking with my friends and doing housework.

My support contacts are \_\_\_\_\_ and \_\_\_\_\_  
(Name & Phone Number) (Name & Phone Number)

| My Symptoms             | I Feel Well                                                                | I Feel Worse                                                                                                                                                                     | I Feel Much Worse                                                                                                                                                                                                                                     |
|-------------------------|----------------------------------------------------------------------------|----------------------------------------------------------------------------------------------------------------------------------------------------------------------------------|-------------------------------------------------------------------------------------------------------------------------------------------------------------------------------------------------------------------------------------------------------|
| I have sputum.          | My usual sputum colour is: <u>Clear</u>                                    | Changes in my sputum, for at least 2 days. Yes <input type="checkbox"/> No <input type="checkbox"/>                                                                              | My symptoms are not better after taking my flare-up medicine for 48 hours.                                                                                                                                                                            |
| I feel short of breath. | When I do this: <u>If I exercise too much like running to catch a bus.</u> | More short of breath than usual for at least 2 days. Yes <input type="checkbox"/> No <input type="checkbox"/>                                                                    | I am very short of breath, nervous, confused and/or drowsy, and/or I have chest pain.                                                                                                                                                                 |
| My Actions              | Stay Well                                                                  | Take Action                                                                                                                                                                      | Call For Help                                                                                                                                                                                                                                         |
|                         | I use my daily puffers as directed.                                        | If I checked 'Yes' to one or both of the above, I use my <b>prescriptions</b> for COPD flare-ups.                                                                                | I will call my support contact and/or see my doctor and/or go to the nearest emergency department.                                                                                                                                                    |
|                         | If I am on oxygen, I use _____ L/min.                                      | I use my daily puffers as usual. If I am <b>more</b> short of breath than usual, I will take <u>2</u> puffs of <u>Ventolin</u> up to a <b>maximum</b> of <u>4</u> times per day. | <b>I will dial 911.</b>                                                                                                                                                                                                                               |
| <b>Notes:</b>           |                                                                            | I use my breathing and relaxation methods as taught to me. I pace myself to save energy.<br>If I am on oxygen, I will increase it from _____ L/min to _____ L/min.               | <b>Important information:</b> I will tell my doctor, respiratory educator, or case manager <b>within 2 days</b> if I had to use any of my flare-up prescriptions. I will also make follow-up appointments to review my COPD Action Plan twice a year. |




Produced in collaboration with the COPD & Asthma Network of Alberta (CANA).  
 The Canadian Thoracic Society (CTS) acknowledges the past contributions of Living well with COPD and the Family Physician Airways Group of Canada.

**My COPD Action Plan** Teresa \_\_\_\_\_ Date May 25, 2015 \_\_\_\_\_  
Patient's Copy (Patient's Name)




This is to tell me how I will take care of myself when I have a COPD flare-up.  
 My goals are to keep my lungs in good shape

My support contacts are my husband (764-1087) and \_\_\_\_\_  
(Name & Phone Number) (Name & Phone Number)

**Prescriptions for COPD flare-up (Patient to take to pharmacist as needed for symptoms)**

These prescriptions may be refilled two times each, as needed, for 1 year, to treat COPD flare-ups. Pharmacists may fax the doctor's office once any part of this prescription has been filled.

Teresa Kelly \_\_\_\_\_ 123 456 789 101 213 \_\_\_\_\_  
Patient's Name Patient Identifier (e.g. DOB, PHN)

1. (A) If the **colour** of your sputum **CHANGES**, start antibiotic Amoxicillin \_\_\_\_\_ Dose: 500mg #pills: 1 \_\_\_\_\_  
 How often three times daily \_\_\_\_\_ for #days: 10

(B) If the first antibiotic was taken for a flare-up in the **last 3 months**, use this different antibiotic instead:  
 Start antibiotic Moxifloxacin \_\_\_\_\_ Dose: 400mg #pills: 1 \_\_\_\_\_  
 How often once daily \_\_\_\_\_ for #days: 10

**AND / OR**

2. If you are **MORE short of breath** than usual, start prednisone \_\_\_\_\_ Dose: 50mg #pills: 10 \_\_\_\_\_  
 How often: once daily \_\_\_\_\_ for #days: 5

Once I start any of these medicines, I will tell my doctor, respiratory educator, or case manager within **2 days**.

Dr. Dinkhout \_\_\_\_\_ 892-3452 \_\_\_\_\_  
Doctor's Name Doctor's Fax Doctor's Signature

123-567 \_\_\_\_\_ May 25, 2015 \_\_\_\_\_  
License Date




Produced in collaboration with the COPD & Asthma Network of Alberta (CANA).  
 The Canadian Thoracic Society (CTS) acknowledges the past contributions of Living well with COPD and the Family Physician Airways Group of Canada. **PART 2 OF 2**

**Lignes directrices**  
canadiennes en santé respiratoire

**COPD ACTION PLAN (Patient's copy)**

**Why do I need this COPD Action Plan?**

- Your Action Plan is a written contract between you and your health care team. It will tell you how to manage your COPD flare-ups. Use it along with any other information you get from your health care team about managing your COPD every day.
- Your Action Plan will help you and your caregivers to quickly recognize and act to treat your flare-ups. This will keep your lungs and you as healthy as possible.

**How will I know that I am having a COPD "flare-up"?**

- You will often see a change in your amount or colour of sputum and/or you may find that you are more short of breath than usual. Other symptoms can include coughing and wheezing more.
- Your flare-up Action Plan is to be used only for COPD flare-ups. Remember that there are other reasons you may get short of breath, such as when you have pneumonia, are anxious, or have heart problems.
- Before or during a flare-up you may notice changes in your mood, such as feeling down or anxious. Some people have low energy or feel tired before and during a COPD flare-up.

**What triggers a "COPD flare-up"?**

- A COPD flare-up can sometimes happen after you get a cold or flu, or when you are stressed and run down.
- Being exposed to air pollution and changes in the weather can also cause COPD flare-ups. To learn about the daily air quality in your area, visit Environment Canada's Air Quality Health Index (AQHI) website at [www.ec.gc.ca/cas-aqhi/](http://www.ec.gc.ca/cas-aqhi/) and click on 'Your Local AQHI Conditions'. Ask your health care team about ways to avoid all possible triggers.

**When should I use this COPD Action Plan?**

- Your COPD Action Plan is used only for COPD flare-ups.
- Remember that there are other reasons you may get short of breath, such as when you have pneumonia, are anxious, or have heart problems. If you become more short of breath but don't have symptoms of COPD flare-up, see a doctor as soon as possible.

**REMEMBER:**

- Learn about your COPD from a respiratory educator, credible websites, such as [www.lung.ca](http://www.lung.ca), and education programs.
- Take your regular daily medicine as prescribed.
- Don't wait more than 48 hours after the start of a COPD flare-up to take your antibiotic and/or prednisone medicines. See your pharmacist quickly to get your prescriptions for COPD flare-up.
- When you start an antibiotic, make sure that you finish the entire treatment.
- Quitting smoking and making sure that your vaccinations are up-to-date (for flu every year and for pneumonia at least once) will help prevent flare-ups.
- Be as active as possible. Inactivity leads to weakness, which may cause more flare-ups or flare-ups that are worse than usual. Ask your doctor about pulmonary rehabilitation and strategies to help reduce your shortness of breath and improve your quality of life.
- Follow up with your doctor within 2 days after using any of your prescriptions for a COPD flare-up.

**MY NOTES AND QUESTIONS:**

**My COPD Action Plan** Teresa \_\_\_\_\_ Date May 25, 2015 \_\_\_\_\_  
Physician's Copy (Patient's Name)

 

This is to tell me how I will take care of myself when I have a COPD flare-up.

My goals are to keep my lungs in good shape \_\_\_\_\_

My support contacts are my husband (764-1087) \_\_\_\_\_ and \_\_\_\_\_  
(Name & Phone Number) (Name & Phone Number)

**Prescriptions for COPD flare-up (Patient to fill as needed for symptoms)**

These prescriptions may be refilled two times each, as needed, for 1 year, to treat COPD flare-ups. Pharmacists may fax the doctor's office once any part of this prescription has been filled.

Teresa Kelly \_\_\_\_\_ 123 456 789 101 213 \_\_\_\_\_  
Patient's Name Patient Identifier (e.g. DOB, PHN)

1. (A) If the colour of your sputum **CHANGES**, start antibiotic Amoxicillin \_\_\_\_\_ Dose: 500mg #pills: 1 \_\_\_\_\_  
 How often three times daily \_\_\_\_\_ for #days: 10 \_\_\_\_\_

(B) If the first antibiotic was taken for a flare-up in the last **3 months**, use this different antibiotic instead:  
 Start antibiotic Moxifloxacin \_\_\_\_\_ Dose: 400mg #pills: 1 \_\_\_\_\_  
 How often once daily \_\_\_\_\_ for #days: 10 \_\_\_\_\_

**AND / OR**

2. If you are **MORE short of breath** than usual, start prednisone \_\_\_\_\_ Dose: 50mg #pills: 10 \_\_\_\_\_  
 How often: once daily \_\_\_\_\_ for #days: 5 \_\_\_\_\_

Once I start any of these medicines, I will tell my doctor, respiratory educator, or case manager within **2 days**.

Dr. Dinkhout \_\_\_\_\_ 892-3452 \_\_\_\_\_ \_\_\_\_\_  
Doctor's Name Doctor's Fax Doctor's Signature

123-567 \_\_\_\_\_ May 25, 2015 \_\_\_\_\_  
License Date

THE LUNG ASSOCIATION™ L'ASSOCIATION PULMONAIRE | CANADIAN THORACIC SOCIETY SOCIÉTÉ CANADIENNE DE THORACOLOGIE | Produced in collaboration with the COPD & Asthma Network of Alberta (CANA). The Canadian Thoracic Society (CTS) acknowledges the past contributions of Living well with COPD and the Family Physician Airways Group of Canada. PART 2 OF 2

**COPD ACTION PLAN (Physician's copy)**

**Pharmacological Treatment**  
 1. Short-acting (beta<sub>2</sub>-agonists and anticholinergic) bronchodilators to treat wheeze and dyspnea. Continue all of your long acting bronchodilators or inhaled steroids as prescribed.  
 2. Prednisone (oral) → 25-50 mg once daily for 10 days for patients with moderate to severe COPD.  
 3. Antibiotic choice is prescribed based upon the presence of risk factors as below.  
 4. Severe AECOPD complicated by acute respiratory failure is a medical emergency. Consider consultation with an emergency specialist or respirologist.

**Antibiotic Treatment Recommendations for Acute COPD Exacerbations<sup>1,2</sup>**

| Group                                                                                                                                                                                                                                      | Probable Pathogens                                                                                                        | First Choice                                                                                                                                                    | Alternatives for Treatment Failure                                                |
|--------------------------------------------------------------------------------------------------------------------------------------------------------------------------------------------------------------------------------------------|---------------------------------------------------------------------------------------------------------------------------|-----------------------------------------------------------------------------------------------------------------------------------------------------------------|-----------------------------------------------------------------------------------|
| I, Simple<br>Smokers<br>FEV1 > 50%<br>≤ 3 exacerbations per year                                                                                                                                                                           | H. influenzae<br>M. catarrhalis<br>S. pneumoniae                                                                          | Amoxicillin, 2nd or 3rd generation<br>cephalosporin,<br>doxycycline, extended spectrum macrolides,<br>trimethoprim-sulfamethoxazole<br>(in alphabetical order). | Fluoroquinolone<br>β-lact/β-lactamase inhibitor                                   |
| II, Complicated, as per I, plus at least one of the following should be present:<br>FEV1 < 50% predicted; ≥4 exacerbations/year;<br>ischemic heart disease; use home oxygen or chronic oral steroids; antibiotic use in the past 3 months. | As in group I, plus:<br>Klebsiella spp. and other Gram-negative bacteria<br>Increased probability of β-lactam resistance. | Fluoroquinolone<br>β-lact/β-lactamase inhibitor<br>(in order of preference).                                                                                    | May require parenteral therapy.<br>Consider referral to a specialist or hospital. |
| III, Chronic Suppurative<br>II, plus: Constant purulent sputum; some have bronchiectasis; FEV1 usually < 35% predicted; chronic oral steroid use; multiple risk factors.                                                                   | As in group II, plus:<br>P. Aeruginosa and multi-resistant Enterobacteriaceae.                                            | Ambulatory - tailor treatment to airway pathogen;<br>P. Aeruginosa is common (ciprofloxacin)<br>Hospitalized - parenteral therapy usually required.             |                                                                                   |

**General Recommendations for the Physician**  
 Patients need to be instructed to call or visit their treating physician if symptoms persist or worsen after 48 hrs in spite of patient-initiated treatment. Please instruct patients to notify their doctor, respiratory educator, or case manager within 2 days of filling any of their prescriptions for a COPD flare-up.  
 • Prescriptions for antibiotics and prednisone can be refilled twice each, as needed, for 1 year. Pharmacists may fax the doctor's office after any portion of the prescriptions for COPD flare-up has been filled.  
 • To reduce the risk of antibiotic resistance, if more than one treatment is required over 3 months, the class of antibiotics should be changed on subsequent courses of therapy.  
 • Review with your patient measures to prevent future COPD exacerbations including smoking cessation, annual influenza vaccination, pneumococcal vaccination and appropriate use of inhaled daily medications.  
 • Consider referral to a local respiratory educator and pulmonary rehabilitation program if available.

<sup>1</sup> O'Donnell DE, Hernandez P, Kapteina A, Aaron S, et al. CTS recommendations for management of COPD - 2008 update - highlights for primary care. Can Respir J 2008; 11(5): 161-164.  
<sup>2</sup> Bhatti MS, La Forge J, Low DE, Mordant L, et al. Canadian guidelines for the management of acute exacerbation of chronic bronchitis. Can Respir J 2003; 10(Suppl 3): 33-35.



**My COPD Action Plan** Teresa Date May 25, 2015  
 Pharmacist's Copy (Patient's Name)

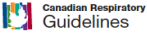 

This is to tell me how I will take care of myself when I have a COPD flare-up.

My goals are to keep my lungs in good shape

My support contacts are my husband (764-1087) and \_\_\_\_\_  
 (Name & Phone Number) (Name & Phone Number)

**Prescriptions for COPD flare-up (Patient to fill as needed for symptoms)**

These prescriptions may be refilled two times each, as needed, for 1 year, to treat COPD flare-ups. Pharmacists may fax the doctor's office once any part of this prescription has been filled.

Teresa Kelly 123 456 789 101 213  
 Patient's Name Patient Identifier (e.g. DOB, PHN)

1. (A) If the colour of your sputum **CHANGES**, start antibiotic Amoxicillin Dose: 500mg #pills: 1  
 How often three times daily for #days: 10

(B) If the first antibiotic was taken for a flare-up in the **last 3 months**, use this different antibiotic instead:  
 Start antibiotic Moxifloxacin Dose: 400mg #pills: 1  
 How often once daily for #days: 10

**AND / OR**

2. If you are **MORE short of breath** than usual, start prednisone \_\_\_\_\_ Dose: 50mg #pills: 10  
 How often: once daily for #days: 5

Once I start any of these medicines, I will tell my doctor, respiratory educator, or case manager within **2 days**.

Dr. Dinkhout 892-3452 \_\_\_\_\_  
 Doctor's Name Doctor's Fax Doctor's Signature

123-567 May 25, 2015  
 License Date

  Produced in collaboration with the COPD & Asthma Network of Alberta (CANA).  
 The Canadian Thoracic Society (CTS) acknowledges the past contributions of Living well with COPD and the Family Physician Airways Group of Canada.



## Framework for Pharmacist Role

1. Does the patient have undiagnosed COPD?
2. Is the patient properly managed by the current regimen?
3. **Is the patient properly using the device or using the right device?**
4. What pharmacist's services can aid COPD management?

## Assessment of Inhalation Technique<sup>1</sup>

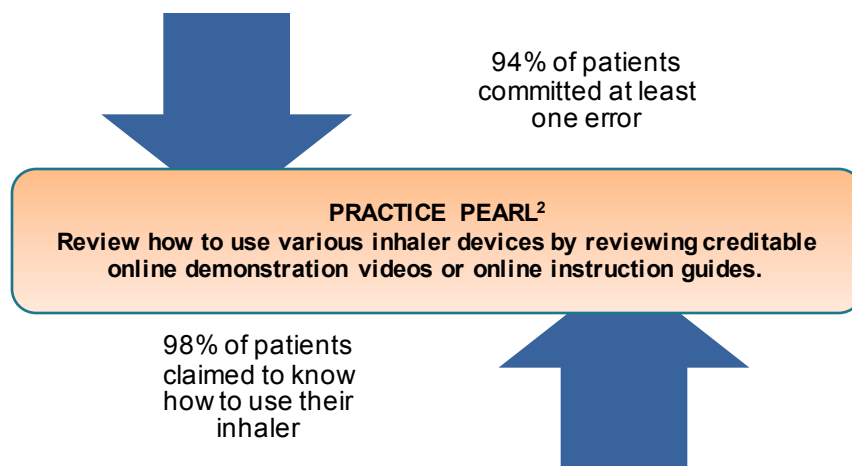

1. SelfTH, et al. Journal of Family Practice. 2011; 60(12): 714-720. 2. Canadian Lung Association. [http://www.lung.ca/diseases-maladies/help-aide/devices-dispositifs/index\\_e.php](http://www.lung.ca/diseases-maladies/help-aide/devices-dispositifs/index_e.php).

| Comparison of Inhaler Devices <sup>1,2</sup> |                     |                |                  |                  |                                      |
|----------------------------------------------|---------------------|----------------|------------------|------------------|--------------------------------------|
| Devices                                      | Advantages          |                |                  |                  |                                      |
|                                              | Simple device setup | Dose protected | No spacer device | Little lung-hand | Can be used by patients with limited |
| Nebu                                         |                     |                |                  |                  |                                      |
| Metered-dose inhaler (MDI)                   | ✓                   | ✗              | ✗                | ✗                | ✗                                    |
| Pre-mixed powder inhaler (MPI)               |                     |                |                  |                  |                                      |
| Dry powder inhaler (DPI) with dose caps      | ✗                   | ✗              | ✗                | ✗                | ✗                                    |
| Soft inha                                    |                     |                |                  |                  |                                      |

**PRACTICE PEARL**  
Aid in tailoring the choice of inhaler device to the individual patient.

**PRACTICE PEARL**  
Review inhaler technique at regular visits, allowing the patient to demonstrate and ask questions.

**PRACTICE PEARL**  
Collaborate with the patient and physician to initiate an alternative inhaler device within the same therapeutic class if the patient is struggling to properly use the current inhaler device.

1. Newman, SP. Eur Respir Rev. 2005;14(96):102-108 2. Johns R. Pharm Prac. 2013 .

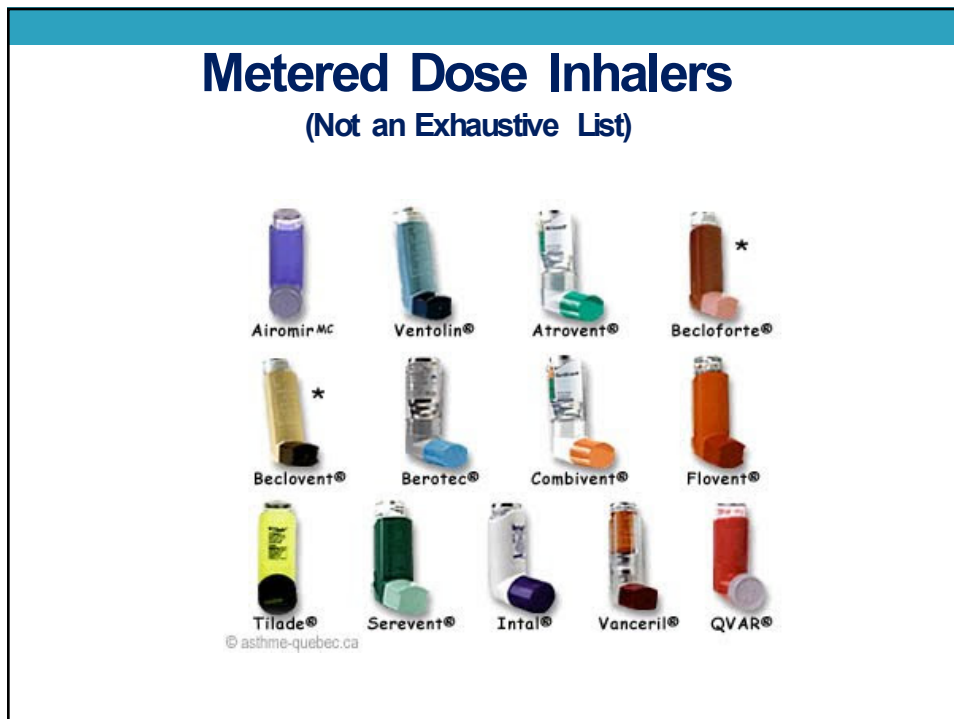

## Metered Dose Inhaler (MDI)

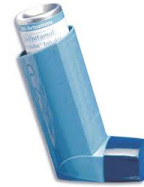

| PRO'S        | CON'S                               |
|--------------|-------------------------------------|
| Familiar     | Should be used with spacer          |
| Portable     | Hard to co-ordinate breath          |
| Inexpensive  | No dose indicator                   |
| Quick relief | Need to shake to prime for each use |

## Spacers for use with MDIs

### Spacers should be considered for use with MDIs

- Decreases deposition in mouth and throat
- Increases deposition in the lungs
- Reduces need for actuation/inhalation co-ordination
- May help some with dexterity problems
- Auditory warning whistle if inhalation too fast/strong

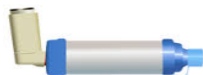

## Multi Dose Inhaler (MDI)

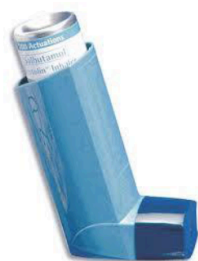

1. Remove cap from inhaler.
2. Shake the inhaler well 5-6 times.
3. Breathe out all the way.
4. Hold the inhaler upright, place the mouthpiece between your teeth and seal your lips around it.
5. As you start to inhale slowly, press the inhaler canister down to release a puff of medicine. Continue to breathe in slowly all the way.
6. Hold your breath for 5-10 seconds.
7. If you need another puff, wait 30 -60 seconds, then repeat all steps.
8. Put the cap back on when finished.
9. Rinse, gargle and spit after taking an inhaled steroid.

The Lung Association. [www.on.lung.ca](http://www.on.lung.ca)

## MDI and Spacer

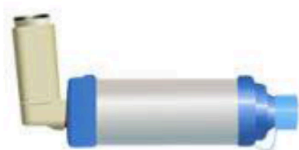

1. Remove the caps from the inhaler and spacer.
2. Shake the inhaler well 5-6 times before each puff.
3. Keep the inhaler upright and insert the mouthpiece into the back of the spacer.
4. Holding the spacer with one hand, place the spacer mouthpiece between the teeth and seal the lips around it.
5. Breathe all the way out. (You may prefer to breathe out before placing the mouthpiece into your mouth.)
6. As you start to inhale slowly, press the inhaler canister down with your other hand to release a puff of medicine into the spacer. Continue to breathe in **slowly** all the way.
7. Hold your breath for 5-10 seconds with the spacer in or out of your mouth.
8. (if you cannot take a slow deep breath, it is okay to breathe in as deeply as you can 2-3 times, keeping a good seal on the mouthpiece.)
9. If another puff is needed, wait 30-60 seconds and repeat steps 2-7.

The Lung Association. [www.on.lung.ca](http://www.on.lung.ca)

## Diskus GSK

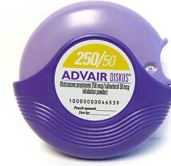

| Trade Name   | Flovent     | Serevent   | Advair                     |
|--------------|-------------|------------|----------------------------|
| Generic Name | Fluticasone | Salmeterol | Fluticasone/<br>salmeterol |
| Class        | ICS         | LABA       | ICS/LABA<br>combo          |
| Approval     | 2002        | 2002       | 2002                       |

## Diskus GSK

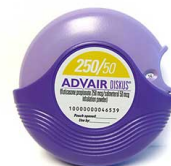

| PRO'S                                                 | CON'S                               |
|-------------------------------------------------------|-------------------------------------|
| Breath-actuated                                       | Bulky                               |
| Propellant free                                       | Sometimes only one step completed   |
| Multi dose with counter                               | Moisture sensitive                  |
| Easy 2 step process                                   | BID                                 |
| No chamber necessary                                  | Requires high inspiratory flow rate |
| No coordination required for actuation and inhalation | Strong and fast inhalation          |

## Diskus

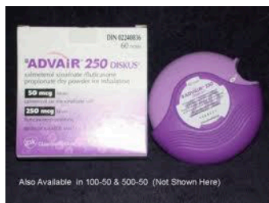

1. To open the inhaler, hold it in one hand.
2. Put the thumb of the other hand into tee thumb grip and slide it back until a click is heard. You will now see the mouthpiece and medicine lever.
3. With the mouthpiece facing you, slide the medicine lever back all the way until a click is heard.
4. (Do not shake it, tip it, drop it or breathe into it.)
5. Breathe out.
6. Seal your lips around the mouth piece and breathe in quickly and deeply, through your mouth.
7. Hold your breath for 5-10 seconds.
8. Close the inhaler by sliding the thumb grip back towards you as far as it goes, to its original position. You will no longer see the mouthpiece or medicine lever.
9. If you need another dose, repeat steps 1-7.

The Lung Association. [www.on.lung.ca](http://www.on.lung.ca)

## HandiHaler Boehringer Ingelheim

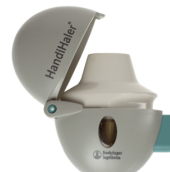

|              |            |
|--------------|------------|
| Trade Name   | Spiriva    |
| Generic Name | Tiotropium |
| Class        | LAMA       |
| Approval     | Nov 2002   |

## HandiHaler Boehringer Ingelheim

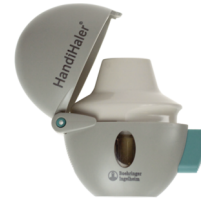

| PRO'S                                          | CON'S                   |
|------------------------------------------------|-------------------------|
| Breath-actuated                                | Multiple steps          |
| Portable                                       | Requires good dexterity |
| Propellant free                                |                         |
| No activation/inhalation coordination required |                         |
| Easy to track remaining doses                  |                         |

## HandiHaler

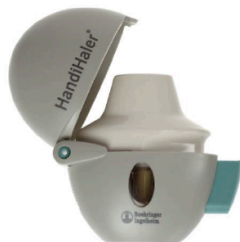

1. Open cap
2. Open mouthpiece
3. Remove capsule from blister and place in chamber
4. Close mouthpiece until it clicks
5. Press green piercing button in once and release
6. Breathe out gently away from mouthpiece
7. Put mouthpiece between teeth without biting and close lips to form good seal
8. Breathe in slowly and deeply, so capsule vibrates
9. Continue to breathe in as long as comfortable
10. While holding breath, remove inhaler from mouth
11. Breathe out gently away from mouthpiece
12. Put mouthpiece back between teeth without biting and close lips to form good seal
13. Breathe in slowly and deeply again, so capsule vibrates
14. Continue to breathe in as long as comfortable
15. While holding breath, remove inhaler from mouth
16. Breathe out gently away from mouthpiece
17. Open mouthpiece and remove used capsule
18. If an extra dose is needed, repeat steps 3 to 17
19. Close mouthpiece and cap

The Lung Association. [www.on.lung.ca](http://www.on.lung.ca)

## Turbuhaler Astra Zeneca

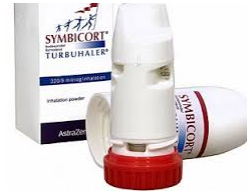

| PRO'S                                   | CON'S                 |
|-----------------------------------------|-----------------------|
| Breath-actuated                         | Double turn confusing |
| Portable                                | Priming necessary     |
| Multi-dose                              | Moisture sensitive    |
| No chamber necessary                    |                       |
| No coordination required for inhalation |                       |

## Turbuhaler Astra Zeneca

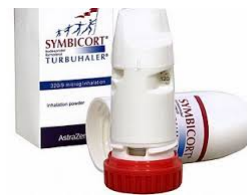

| Trade Name   | Pulmicort  | Oxeze         | Symbicort                 |
|--------------|------------|---------------|---------------------------|
| Generic Name | Budesonide | Formoterol    | Budesonide/<br>formoterol |
| Class        | ICS        | LABA          | ICS/LABA<br>combo         |
| Approval     | 1996       | 1998 * Asthma | 2002* asthma<br>2009 COPD |



## Turbuhaler

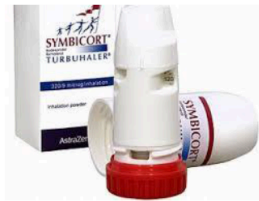

1. Hold it upright , with the grip at the bottom, unscrew and remove the cover.
2. Turn the grip all the way in one direction, then back all the way in the other direction. You will hear a click during this step which means the medicine is loaded.
3. (Do not shake, tip, drop or breathe into the turbuhaler.)
4. Breathe out away from the inhaler.
5. Place the mouthpiece between your teeth and seal your lips around it.
6. Breathe in quickly and deeply.
7. Hold your breath for 5 – 10 seconds.
8. If a second dose is needed, repeat steps 2-6.
9. When finished, replace the cover and twist until it is tightly closed.

The Lung Association. [www.on.lung.ca](http://www.on.lung.ca)

## Breezhaler Novartis

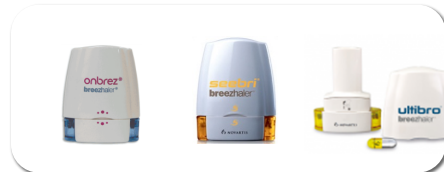

| PRO'S                                                 | CON'S                                     |
|-------------------------------------------------------|-------------------------------------------|
| Low resistance                                        | Single dose inhaler                       |
| Small                                                 | Loose cap                                 |
| Clear Capsules                                        | Low resistance can lead to throat pooling |
| No coordination required for actuation and inhalation | Small                                     |
|                                                       | Multiple piercing can lead to issues      |

## Breezhaler

### Novartis

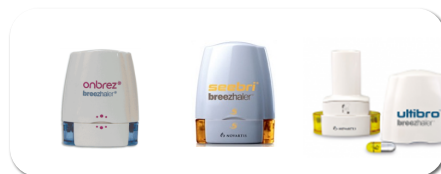

| Trade Name   | Onbrez      | Seebri         | Ultibro             |
|--------------|-------------|----------------|---------------------|
| Generic Name | indacaterol | glycopyrronium | inda/glyco<br>combo |
| Class        | LABA        | LAMA           | LABA/LAMA<br>combo  |
| Approval     | Dec 2011    | October 2012   | Dec 2013            |

## Breezhaler<sup>1,2</sup>

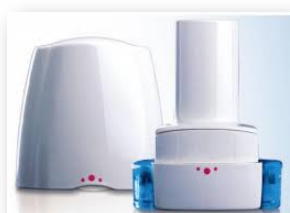

### How to Use the Breezhaler Inhaler

1. Pull off the cap
2. Open the mouthpiece.
3. Remove capsule from package.
4. Place capsule in chamber.
5. Close mouthpiece until you hear it click.
6. Press side buttons once and release.
7. Breath out.
8. Seal lips around mouthpiece.
9. Breath in quickly and deeply.
10. Hold breath for 5-10 seconds.
11. Breath out.
12. Open the mouthpiece.
13. If capsule is not empty, repeat steps.
14. Open mouthpiece.
15. Remove empty capsule.
16. Replace cap.
17. Wash hands.

1. Young D et al. Indacaterol, p. 117-128.

## Genuair

Astra Zeneca

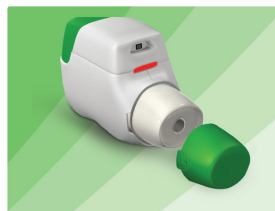

| PRO'S                                                 | CON'S                               |
|-------------------------------------------------------|-------------------------------------|
| Pre-loaded for one month                              | High resistance = hard for patients |
| Auditory cue                                          | Loose cap                           |
| Large dose counter                                    | Gritty texture in mouth             |
| Easy to load dose                                     | Bitter taste                        |
| No coordination required for actuation and inhalation | Powder deposition in mouth          |

## Genuair

Astra Zeneca

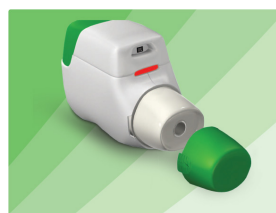

| Trade Name   | Tudorza     |
|--------------|-------------|
| Generic Name | acclidinium |
| Class        | LAMA        |
| Approval     | July 2013   |

## Genuair<sup>1,2</sup>

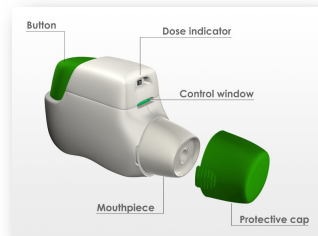

### How to Use the Genuair Inhaler

1. Remove the protective cap by lightly squeezing the arrows and pulling outwards.
2. Hold horizontally with the green button facing up.
3. Press the green button all the way down.
4. Release the green button.
5. Check the control window has turned green.
6. Breathe out fully.
7. Seal lips around mouthpiece.
8. Breathe in strongly and quickly. (Click will be heard if inhaler is being used correctly.)
9. Continue to breathe in strongly and quickly.
10. Hold breath for 5-10 seconds
11. Ensure control window has turned red.
12. Replace cap.
13. Rinse mouth.

1. Almirall Sofotec. [http://www.almirallsofotec.com/en/genuair\\_fw.html](http://www.almirallsofotec.com/en/genuair_fw.html).

## Ellipta GSK

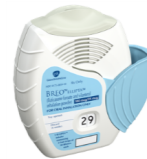

| PRO'S                                                 | CON'S                |
|-------------------------------------------------------|----------------------|
| Pre-loaded                                            | High resistance      |
| Very few steps                                        | Bulky                |
| Large dose counter                                    | Must keep vents open |
| Attached cap                                          |                      |
| No coordination required for actuation and inhalation |                      |

## Ellipta GSK

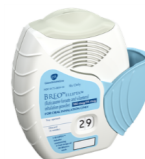

| Trade Name   | Breo                       | Anoro                       | Incruse      |
|--------------|----------------------------|-----------------------------|--------------|
| Generic Name | fluticasone/<br>vilanterol | umeclidinium/<br>vilanterol | umeclidinium |
| Class        | ICS/LABA<br>combo          | LAMA/LABA<br>combo          | LAMA         |
| Approval     | July 2013                  | December 2013               | April 2014   |

## Ellipta<sup>1,2,3</sup>

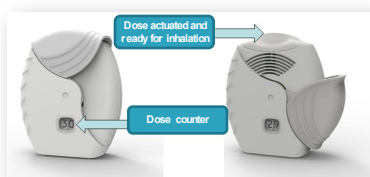

### How to Use the Ellipta Inhaler

1. Hold the inhaler in an upright position.
2. Slide the cover down until you hear a click.
3. The dose counter will count down by one number. This shows that the dose is ready to inhale.
4. While holding the inhaler away from your mouth, breathe out as far as is comfortable.
5. Put the mouthpiece between your lips, and close your lips firmly around it.
6. Keep the tongue away from the mouthpiece.
7. Take one long, steady, deep breath in.
8. Hold this breath for at least 3-4 seconds.
9. Remove the inhaler from your mouth and breathe out slowly and gently.
10. Slide the cover upwards as far as it will go to recover the mouthpiece.
11. Rinse mouth if inhaler contains an ICS.

1. GlaxoSmithKline. [http://hcp.gsk.ie/products/Anoro\\_Ellipta/ellipta\\_inhaler/how\\_to\\_use\\_ellipta.html](http://hcp.gsk.ie/products/Anoro_Ellipta/ellipta_inhaler/how_to_use_ellipta.html). 2. Riley J et al. [http://www.sec.gov/Archives/edgar/data/1080014/000110465913068858/a13-20034\\_text9d2.htm](http://www.sec.gov/Archives/edgar/data/1080014/000110465913068858/a13-20034_text9d2.htm).

## Respimat

Boehringer Ingelheim

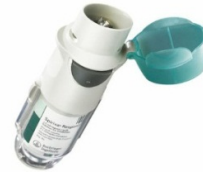

| Trade Name   | Spiriva    | Combivent                  |
|--------------|------------|----------------------------|
| Generic Name | tiotropium | ipratropium/<br>salbutamol |
| Class        | LAMA       | SAMA/SABA                  |
| Approval     | Dec 2014   | Jan 2014                   |

## Respimat

Boehringer Ingelheim

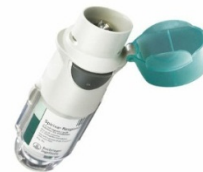

| PRO'S                                                  | CON'S                     |
|--------------------------------------------------------|---------------------------|
| Pre-loaded                                             | Initial cartridge loading |
| Gentle inhalation experience                           | Priming necessary         |
| Actuation independent of patient's inspiratory flow    |                           |
| Minimal Inspiratory Flow rate required to deliver drug |                           |
| Attached cap                                           |                           |
| Dose indicator                                         |                           |
| High lung deposition / low oropharyngeal deposition    |                           |
| Locking mechanism when cartridge is empty              |                           |

## Respimat Soft Mist<sup>1,2,3,4</sup>

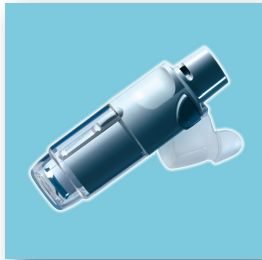

### How to Use a Respimat Soft Mist Inhaler

1. Hold the inhaler upright with the cap closed.
2. Turn the transparent base until it clicks.
3. Open the cap.
4. Breathe out slowly.
5. Insert the mouthpiece.
6. Point the inhaler towards the back of the throat.
7. While taking a deep breath, press the dose-release button, and continue to breathe.
8. Hold your breath for 10 seconds, or as long as it is comfortable.
9. Then breathe out slowly.

1. Hodder R et al. International Journal of COPD 2009;4:225–232. 2. Boehringer Ingelheim. [http://www.respimat.com/functions\\_and\\_use/how\\_to\\_use.html](http://www.respimat.com/functions_and_use/how_to_use.html). 3. Boehringer Ingelheim. <http://www.respimat.com/services/services/photograph.html>.

## Revisit Theresa

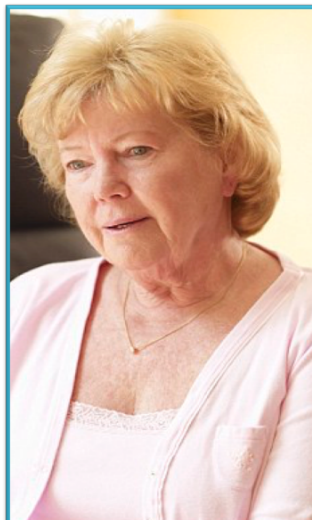

- Diagnosed with COPD
- Prescribed tiotropium once daily
- Shown how to use inhaler device
- Back for first refill
- Asked to demonstrate inhalation technique
- Not using inhaler device properly

**What can the pharmacist do to improve inhalation technique?**

## What can the pharmacist do to improve Theresa's inhalation technique?

- ✓ Slowly re-demonstrate the correct technique
- ✓ Have Theresa repeat the demonstration, while checking against a checklist of essential steps
- ✓ Give Theresa a record of any step(s) incorrectly performed during her demonstration, by highlighting those on the checklist
- ✓ At subsequent visits, repeat assessment and education
- ✓ Direct Theresa to reliable information online that clearly shows her how to use her inhaler

1. National Asthma Council Australia. [http://www.nationalasthma.org.au/uploads/content/237-Inhaler\\_technique\\_in\\_adults\\_with\\_asthma\\_or\\_COPD.pdf](http://www.nationalasthma.org.au/uploads/content/237-Inhaler_technique_in_adults_with_asthma_or_COPD.pdf).

## Framework for Pharmacist Role in COPD Management

1. Does the patient have undiagnosed COPD?
2. Is the patient properly managed by the current regimen?
3. Is the patient properly using the device or using the right device?
4. **What pharmacist's clinical services can aid COPD management?**



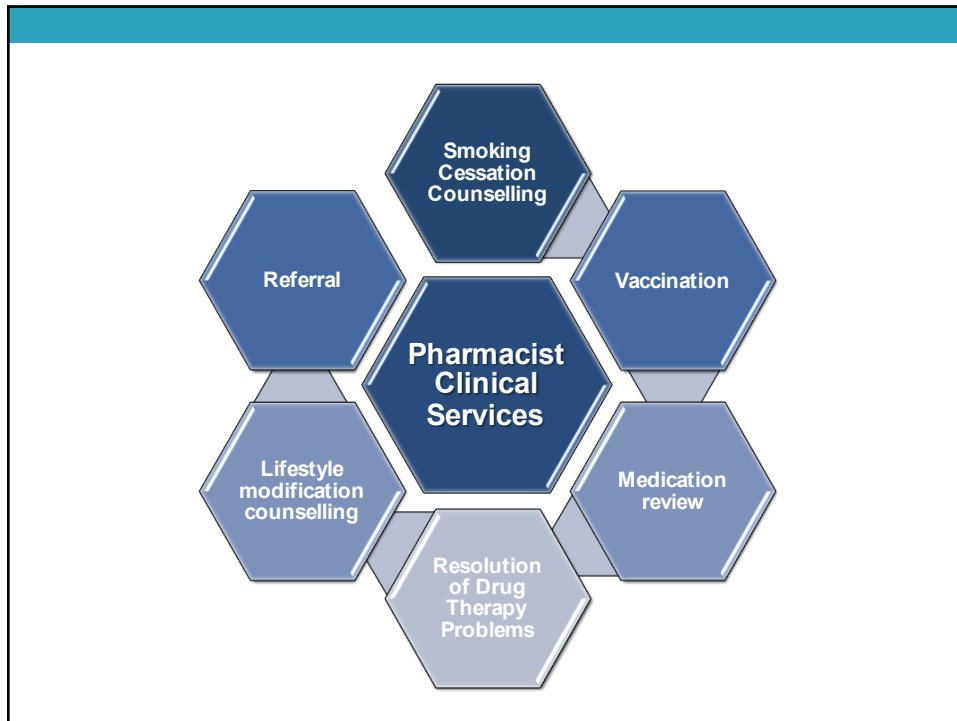

## Smoking Cessation Counselling<sup>1,2,3</sup>

### PRACTICE PEARL

Make screening for smoking history a part of the prescription filling process

### PRACTICE PEARL

Initiate a prescription for a smoking cessation medication where applicable.

1. O'Donnell DE et al. Can Respir J. 2008;15(SupplA):1A-8A. 2. O'Donnell DE et al. Can Respir J. 2007;14(SupplB):5B-32B.3. Fiee MC et al. Treating Tobacco Use and Dependence 2008 Update. Clinical Practice Guideline. 2008.

## Vaccination

### Influenza<sup>1</sup>

- Role to play in prevention of acute exacerbations
- Reduces the morbidity and mortality from COPD by as much as 50% in elderly patients
- Reduces incidence of hospitalization by as much as 39% in patients with chronic lung disease

#### PRACTICE PEARL

**When hosting vaccination shot clinics, contact all of your COPD patients to book an appointment.**

### Pneumococcal<sup>1,2</sup>

- vaccine at least once
- High-risk patients should possibly receive vaccine again in five to ten years
- Pneumococcal 23-valent polysaccharide vaccine normally recommended for all adults ≥ 65 years

1. O'Donnell DE et al. Can Respir J. 2008; 15(Suppl A):1A-8A. 2. Public Health Agency of Canada. <http://www.phac.aspc.gc.ca/publicat/dg/gd/p04-pneu-eng.php>.

## Medication Review<sup>1</sup>

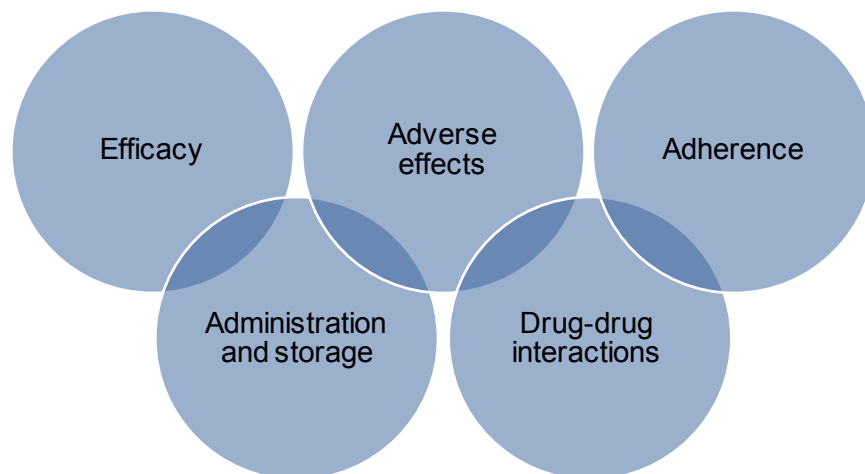

1. Bourbeau J et al. Thorax. 2008;63(9):831-838.

## Resolution of Drug Therapy Problems

What?<sup>1</sup>

Identification by the

Possible impact?<sup>1</sup>

### PRACTICE PEARL

**When contacting the prescriber, make a clear clinical recommendation.**

or when conducting a medication review

COPD therapy changed or adjusted (e.g. add therapy or discontinue therapy).

1. Pojatic N et al. OPA Conference; 2014.

## Lifestyle Modification Counselling

### Eating<sup>1</sup>

- Eat small frequent meals

### Physical Activity<sup>2,3</sup>

- Regular activity to maintain

### PRACTICE PEARL

**Engage patients in discussion of lifestyle modification options and encourage them to make decisions about which modifications will work best for them.**

- Breathe evenly when chewing
- Take plenty of time to eat
- Reduce or avoid troublesome foods

- Use slow, smooth movements
- Alternate periods of work and rest
- Pulmonary rehabilitation

1. Canadian Lung Association. [http://www.lung.ca/diseases-maladies/copd-mpoc/ving-vivre/eat-manger\\_e.php](http://www.lung.ca/diseases-maladies/copd-mpoc/ving-vivre/eat-manger_e.php). 2. Canadian Lung Association. [http://www.lung.ca/diseases-maladies/copd-mpoc/ving-vivre/energy-energie\\_e.php](http://www.lung.ca/diseases-maladies/copd-mpoc/ving-vivre/energy-energie_e.php). 3. Canadian Lung Association. [http://www.lung.ca/diseases-maladies/copd-mpoc/signs-signes/index\\_e.php](http://www.lung.ca/diseases-maladies/copd-mpoc/signs-signes/index_e.php).

## Referral

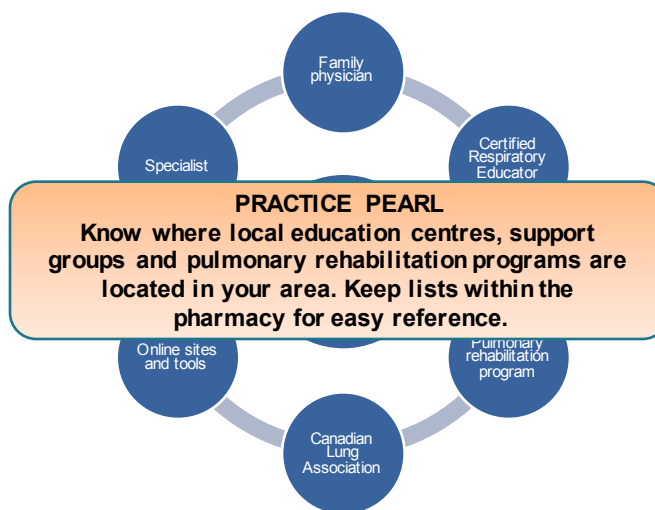

1. Public Health Agency of Canada. <http://www.phac-aspc.gc.ca/cd-mc/publications/copd/mpooff-tr-2011-eng.php>. 2. Canadian Lung Association. [http://www.lung.ca/diseases-mdadies/copd/mpoof-treatment-traitement/rehab-readaptation\\_e.php](http://www.lung.ca/diseases-mdadies/copd/mpoof-treatment-traitement/rehab-readaptation_e.php).

## Key Takeaways

- Pharmacists are uniquely positioned to play an enhanced role in COPD medication and device management
- Target at risk patients for spirometry to identify undiagnosed COPD cases, while increasing the likelihood of early and/or prompt diagnosis.
- Emphasize seriousness of the disease to all COPD patients and stress the importance of optimal symptom management and prevention of acute exacerbations.
- Promote the non-pharmacological and pharmacological management of COPD, focusing in particular on smoking cessation counselling, lifestyle modifications and influenza and pneumococcal immunization.

## Key Takeaways

- Regularly assess whether COPD patients are optimally managed on current pharmacotherapy by assessing adherence, dyspnea and number and severity of AECOPDs.
- Discuss the advantages and disadvantages of various inhalation delivery devices/systems with patients and other healthcare providers.
- Assess inhalation technique at regular pharmacy visits as proper inhalation technique is just as important as the right drug in COPD management.
- Ensure patients have a COPD Action Plan and regularly review it with the patient.

## Questions

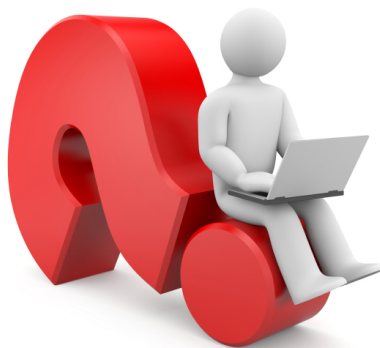

Supplement: MOESM3 [file 10870358]
