# Supplementary material for: Effectiveness of a pharmacist-driven intervention in COPD (EPIC): study protocol for a randomized controlled trial
Source: Springer Nature journal article supplement (doi:10.1186/s13063-016-1623-7), 2016-10-13
Supplement: MOESM2 [file 10870358]

## Appendix A – Participating Pharmacies

| <b>ID#</b> | <b>Pharmacy</b>                                                                         | <b>Allocation</b> |
|------------|-----------------------------------------------------------------------------------------|-------------------|
| <b>1</b>   | Shoppers Drug Mart<br>P.O. Box 229 5 First Avenue<br>Pasadena NL A0L 1K0                | Control           |
| <b>2</b>   | Shoppers Drug Mart<br>PO Box 807 30 Bond Street<br>Grand Falls-Windsor NL A2A 2M4       | Intervention      |
| <b>3</b>   | The Drug Store Pharmacy<br>62 Prince Rupert Drive<br>Stephenville NL A2N3W7             | Control           |
| <b>4</b>   | Sobey's Pharmacy<br>21 Cromer Ave.<br>Grand Falls-Windsor NL A2A 1X3                    | Control           |
| <b>5</b>   | Loblaw Pharmacy<br>166 Conception Bay Hwy.<br>Conception Bay South NL A1W 3A6           | Intervention      |
| <b>6</b>   | Walmart Pharmacy<br>75 Kelsey Drive<br>St. John's NL A1B 5C8                            | Control           |
| <b>7</b>   | Lawton's Drugs<br>P.O. Box 1000 486 Main Street West<br>Lewisporte NL A0G 3A0           | Control           |
| <b>8</b>   | Shoppers Drug Mart<br>Churchill Square 394 Elizabeth Avenue<br>St. John's NL A1B2X1     | Intervention      |
| <b>9</b>   | Walmart Pharmacy<br>470 Topsail Road<br>St. John's NL A1E 2C3                           | Control           |
| <b>10</b>  | Breakwater Pharmacy<br>1604 Portugal Cove Road<br>Portugal Cove- St. Philips NL A1M 3G7 | Intervention      |
| <b>11</b>  | Lawton's Drugs<br>645 Conception Bay Hwy, #102<br>Conception Bay South NL A1X 7L5       | Intervention      |
| <b>12</b>  | Loblaw Pharmacy<br>240B Memorial Drive<br>Clareville NL A5A 1N9                         | Control           |

|           |                                                                          |              |
|-----------|--------------------------------------------------------------------------|--------------|
| <b>13</b> | Sinyard's Pharmacy<br>P.O. Box 359<br>Harbour Grace NL A0A2M0            | Intervention |
| <b>14</b> | Baccalieu Trail Pharmacy<br>P. O. Box 250<br>Clarke's Beach NL A0A 1W0   | Control      |
| <b>15</b> | Lawton's Drugs<br>496 Topsail Rd<br>St. John's NL<br>A1E 2C2             | Control      |
| <b>16</b> | Walmart Pharmacy<br>42 Queen Street<br>Stephenville NL A2N 2Z5           | Control      |
| <b>17</b> | Sagona Drugs<br>P.O. Box 430 1 Canada Drive<br>Harbour Breton NL A0H 1P0 | Intervention |
| <b>18</b> | Central Pharmacy<br>P.O. Box 496<br>Grand Falls-Windsor NL A2A 2J9       | Intervention |
| <b>19</b> |                                                                          |              |
| <b>20</b> |                                                                          |              |
