# Supplementary material for: Effectiveness of a pharmacist-driven intervention in COPD (EPIC): study protocol for a randomized controlled trial
Source: Springer Nature journal article supplement (doi:10.1186/s13063-016-1623-7), 2016-10-13
Supplement: MOESM4 [file 10870358]

# Intervention Training

Effectiveness of a Pharmacist-Led Intervention in COPD (EPIC)

## Intervention Overview

- The intervention will consist of the following:
  - Medication Review
    - Focusing on COPD medications
  - Patient Education
    - Inhaler technique
    - Non-pharm COPD options
  - COPD Action Plan
    - Developed with the patient and their primary HCP
  - Patient Referral
    - Smoking cessation
    - Pulmonary rehabilitation

## Medication Review

## Med Review

Detailed review of patient's medications:

- Efficacy
  - Focusing on COPD medications
  - As reviewed in COPD therapy presentation
- Safety
  - Focusing on COPD medications and interactions with other medications

## Med Review – Medication Information

- Bronchodilators are medications that relax the airways, allowing you to breathe easier
- “Rescue inhalers” – these are short-term bronchodilators that start to work in ten minutes or less
- There are also long-acting treatments, usually taken once or twice a day, that bronchodilate over the course of the day

## Med Review – Medication Information

- Inhaled corticosteroids are medications that reduce inflammation in the lungs, leading to better symptomatic control and reduced frequency of exacerbations
- Any corticosteroid inhalers – advise patient to wash out mouth after use

## Med Review – Medication Information

- Combination products:
- There are different combo products available
- ICS/LABA – most common, shouldn't see ICS on its own for COPD as evidence is for combo
- Literature says reduced frequency of exacerbation
- LABA/LAMA – better symptomatic management
- May see others

## Med Review – Medication Information

- Other medications:
- If patient is taking any other medications, make sure to go over those with the patient
- What the medication does (in a nutshell)
- What to expect – side effects, effect on disease



## Med Review – Disease Information

Can review disease information as needed:

- Normally when we breath, air goes from our mouth or noses through the airways in our lungs into tiny air sacs, called alveoli
- These alveoli exchange oxygen in the air we breathe for carbon dioxide in our body, which we exhale

## Med Review – Disease Information

- COPD usually results when an irritant, such as tobacco smoke, enters our lungs
- The irritant can cause inflammation in our lungs, resulting in damage to the airways and alveoli
- The airways can become thickened and scarred, limiting the way that air travels through them
- The alveoli can become damaged so that the normal oxygen exchange is impaired

## Med Review – Disease Information

- The damage to the airways and alveoli results in common symptoms associated with COPD:
  - Coughing
  - Phlegm production
  - Shortness of breath, especially with activity
  - Fatigue

## Med Review – Disease Information

- COPD is chronic, irreversible and progressive
- Medications help with symptoms, but the only thing that can affect lung function decline is quitting smoking
- COPD can lead to other diseases, like cardiovascular disease or osteoporosis

## Med Review – Disease Information

- Exacerbations – **make sure patient understands what these are and how to recognize them**
  - A worsening of symptoms, which could include mucous production, shortness of breath, or cough, beyond what you would normally experience throughout the day

## Med Review – Disease Information

- Exacerbations can be caused by infection, air pollutants, or sometimes just spontaneously
- Exacerbations can make your symptoms significantly worse
- They can accelerate lung function decline
- Medications can prevent exacerbations
- Early recognition and treatment is essential

## Patient Education

### Education – Inhaler Technique

- Go over device specifics with patient
- Encourage use of spacer devices
- Priming, taking a dose, storage, cleaning
- Get THEM to show YOU how to use the inhaler
  
- Inhalation device technique – manufacturer's website or Ontario Lung Association
- <https://www.on.lung.ca/inhalationdevicevideos>

## Non-pharmacological Recommendations – Smoking Cessation

- Smoking is one of the most important interventions in the progression of COPD
- However, not everyone is ready to quit smoking
- Nicotine replacement in any form (patch, gum, etc) increases smoking abstinence rates

## Non-pharmacological Recommendations – Smoking Cessation

- Other pharmacological therapy is also effective in helping patients quit smoking(champix, bupropion etc)
- Most effective – a combination of prescription medications and nicotine replacement therapies
- Evidence shows the more supportive counselling you put into it, the more patients get out of it<sup>1</sup>



## Non-pharmacological Recommendations – Smoking Cessation<sup>1</sup>

- The 5 A's to help patients quit smoking:
- ASK: Systematically identify all tobacco users at every visit
- ADVISE: Strongly urge all tobacco users to quit
- ASSESS: Determine willingness to make a quit attempt
- ASSIST: Aid the patient in quitting
- ARRANGE: Schedule follow-up contact

## Non-pharmacological Recommendations – Vaccinations<sup>1</sup>

- Influenza vaccine recommended for all patients
- Pneumococcal recommended for >65 years old or those with significant comorbidities
- Pharmacists in NL can administer both of these
- This makes it really easy to encourage their use to the patient as they can get it right at the pharmacy



## Non-pharmacological Recommendations – Vaccinations

- Educate patient that getting vaccinated helps prevent viral and bacterial infections
- These infections lead to worsening symptoms and potential for exacerbation

## Non-pharmacological Recommendations – Exercise<sup>1</sup>

- Physical exercise is safe and encouraged for people with COPD
- Exercise tolerance can be improved by medications
- Make sure that patients are aware of this – can associate in patient's mind improvement in quality of life with taking their medications properly

## Non-pharmacological Recommendations – Exercise<sup>1</sup>

- Exercise is an important component in pulmonary rehab
- It can help improve dyspnea and fatigue symptoms in patients with COPD
- Recommend individuals walk to a symptom-limited maximum, rest, and then continue walking until 20 minutes of exercise

## COPD Action Plan

## COPD Action Plan

- Develop and review the CTS Action Plan with the patient
- This plan is focused on identifying exacerbations and making a plan for the patient in the event that an exacerbation does occur

**My COPD Action Plan** \_\_\_\_\_ Date \_\_\_\_\_  
Patient's Copy (Patient's Name)




This is to tell me how I will take care of myself when I have a COPD flare-up.

My goals are \_\_\_\_\_

My support contacts are \_\_\_\_\_ and \_\_\_\_\_  
(Name & Phone Number) (Name & Phone Number)

|                         | I Feel Well                           | I Feel Worse                                                                                                                                                     | I Feel Much Worse <b>URGENT</b>                                                                                                                                                                                                                       |
|-------------------------|---------------------------------------|------------------------------------------------------------------------------------------------------------------------------------------------------------------|-------------------------------------------------------------------------------------------------------------------------------------------------------------------------------------------------------------------------------------------------------|
| I have sputum.          | My usual sputum colour is: _____      | Changes in my sputum, for <b>at least 2 days</b> .<br>Yes <input type="checkbox"/> No <input type="checkbox"/>                                                   | My symptoms are not better after taking my flare-up medicine for 48 hours.                                                                                                                                                                            |
| I feel short of breath. | When I do this: _____                 | More short of breath than usual for <b>at least 2 days</b> .<br>Yes <input type="checkbox"/> No <input type="checkbox"/>                                         | I am very short of breath, nervous, confused and/or drowsy, and/or I have chest pain.                                                                                                                                                                 |
| <b>My Actions</b>       | <b>Stay Well</b>                      | <b>Take Action</b>                                                                                                                                               | <b>Call For Help</b>                                                                                                                                                                                                                                  |
|                         | I use my daily puffers as directed.   | If I checked 'Yes' to one or both of the above, I use my <b>prescriptions</b> for COPD flare-ups.                                                                | I will call my support contact and/or see my doctor and/or go to the nearest emergency department.                                                                                                                                                    |
|                         | If I am on oxygen, I use _____ L/min. | I use my daily puffers as usual. If I am <b>more</b> short of breath than usual, I will take _____ puffs of _____ up to a <b>maximum</b> of _____ times per day. | <b>I will dial 911.</b>                                                                                                                                                                                                                               |
| <b>Notes:</b>           |                                       | I use my breathing and relaxation methods as taught to me. I pace myself to save energy.                                                                         | <b>Important information:</b> I will tell my doctor, respiratory educator, or case manager <b>within 2 days</b> if I had to use any of my flare-up prescriptions. I will also make follow-up appointments to review my COPD Action Plan twice a year. |
|                         |                                       | If I am on oxygen, I will increase it from _____ L/min to _____ L/min.                                                                                           |                                                                                                                                                                                                                                                       |

# Patient Referral

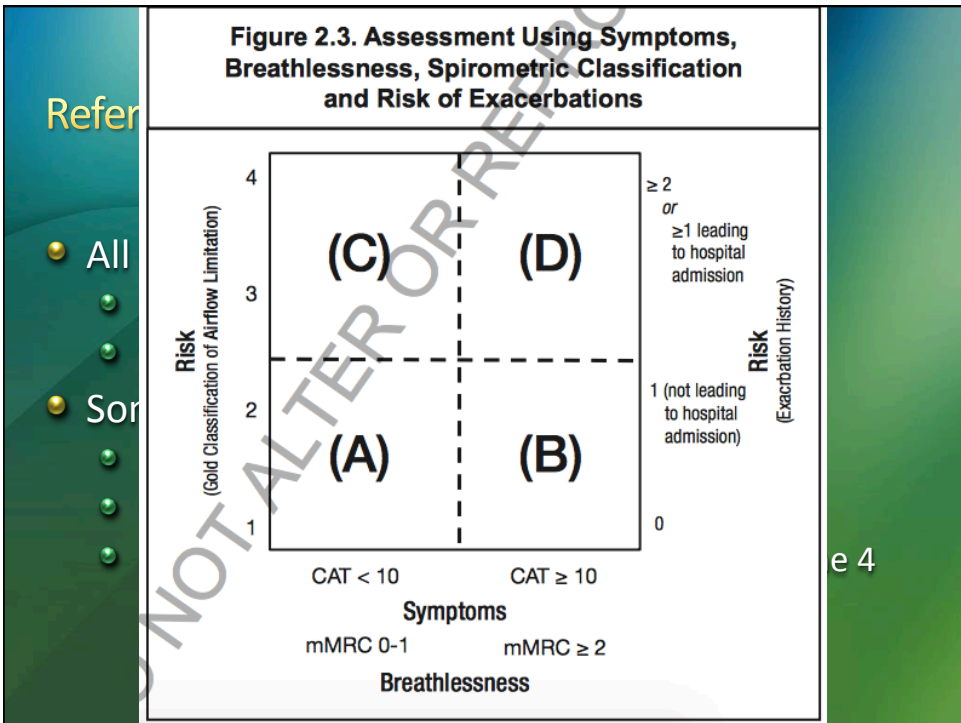

## References

1. Global Initiative for Chronic Obstructive Pulmonary Disease. "Global Strategy for the Diagnosis, Management, and Prevention of Chronic Obstructive Pulmonary Disease." 2015.
2. UpToDate. (2014, January) Patient Information: Chronic Obstructive Pulmonary Disease (COPD), including emphysema (Beyond the Basics). Netherlands: Wolters Kluwer. Retrieved 17 July 2015. <http://www.uptodate.com/contents/chronic-obstructive-pulmonary-disease-copd-including-emphysema-beyond-the-basics>
3. UpToDate. (2014, June) Patient Information: Chronic Obstructive Pulmonary Disease (COPD), treatments (Beyond the Basics). Netherlands: Wolters Kluwer. Retrieved 17 July 2015. <http://www.uptodate.com/contents/chronic-obstructive-pulmonary-disease-copd-treatments-beyond-the-basics>
